1 **Comparison of Small Gut and Whole Gut Microbiota of First-Degree Relatives with Adult**

2 **Patients with Celiac Disease and Controls**

3

4 Sudarshan A. Shetty<sup>1,4#</sup>, Rahul Bodkhe<sup>1#</sup>, Dhiraj P. Dhotre<sup>1</sup>, Anil K. Verma<sup>2,5</sup>, Khushbo Bhatia<sup>2</sup>,

5 Asha Mishra<sup>2</sup>, Gurvinder Kaur<sup>3</sup>, Pranav Pande<sup>1</sup>, Dhinoth K. Bangarusamy<sup>3</sup>, Beena P. Santosh<sup>3</sup>,

6 Rajadurai C. Perumal<sup>3</sup>, Vineet Ahuja<sup>2</sup>, Yogesh S. Shouche<sup>1\*</sup>, Govind K. Makharia<sup>2\*</sup>

7 <sup>1</sup>National Centre for Microbial Resource, National Centre for Cell Science, Pune-411007, India.

8 <sup>2</sup>Department of Gastroenterology and Human Nutrition, All India Institute of Medical Sciences,

9 New Delhi, India.

10 Transplant Immunology & Immunogenetics, All India Institute of Medical Sciences,

11 New Delhi, India

12 <sup>3</sup>AgriGenome Labs Pvt Ltd. Kerala, India.

13 <sup>4</sup> Current address: Laboratory of Microbiology, Wageningen University and Research, Building

14 124, Stippeneng 4, 6708 WE Wageningen, The Netherlands.

15 <sup>5</sup> Current address: Celiac Disease Research Laboratory, Department of Pediatrics, Università

16 Politecnica delle Marche, Ancona, Italy.

17 \*Co-corresponding authors: Yogesh S. Shouche ([yogesh@nccs.res.in](mailto:yogesh@nccs.res.in)) and Govind K. Makharia

18 ([govindmakharia@gmail.com](mailto:govindmakharia@gmail.com))

19 # Authors with equal contribution.

## 20 **Abstract**

21 **Objectives:** Gut microbiota gets altered in patients with celiac disease (CeD) and whether these  
22 microbiota changes are the cause or effect of the disease is not well understood to date. The first  
23 degree relatives (FDRs) of CeD patients are genetically susceptible and may represent a pre-  
24 diseased state. Therefore, understanding differences in duodenal and faecal microbiota  
25 composition between the FDR and CeD subjects is of interest. To investigate this, we  
26 characterised the microbiota in duodenal biopsies and faeces of CeD patients (n = 23), FDRs (n =  
27 15) and control subjects (DC, n= 24) by 16S rRNA gene sequencing.

28 **Results:** Duodenal biopsies showed more diverse pattern in microbial community composition  
29 and structure than faecal samples. In duodenal biopsies, 52 OTUs and 41 OTUs were  
30 differentially abundant between the FDR and DC group, and between the FDR and CeD group  
31 respectively ( $P < 0.01$ ). In faecal samples, 30 OTUs were differentially abundant between FDR  
32 and DC, and 81 between FDR and CeD ( $P < 0.01$ ). Predicted metagenomes from duodenal  
33 microbiomes of FDR and CeD showed a lower genetic potential for metabolizing gluten as  
34 compared to controls.

35 **Conclusions:** The microbial communities of FDR and CeD groups are more similar to each  
36 other than to the control groups. Significant differences at OTU level suggest that specific  
37 bacterial taxa may be important for pathogenesis of CeD. Moreover, the predicted differences in  
38 gluten metabolism potential by the FDR and CeD microbiota point towards the need for  
39 investigating functional capabilities of specific bacterial taxa in healthy FDR and CeD patients.

## 40 **Key words**

41 Gluten, Microbiota, Malabsorption, *Acinetobacter*, *Lactobacillus*.

42

## 43 **Background**

44 Celiac disease (CeD) is a common, chronic immune mediated enteropathy of the small  
45 intestine which affects approximately 0.7% of the global population (1). Once thought to be  
46 uncommon in Asia, CeD is now prevalent in many Asian countries including India (2). CeD is  
47 caused by the consumption of gluten proteins present in cereals such as wheat, barley and rye in  
48 genetically susceptible individuals (3). While many genes are involved in the development of  
49 CeD, thus far only the presence of HLA-DQ2 or DQ8 haplotype is considered to be essential (4).  
50 Additional factors that contribute to pathogenesis include other co-genetic factors (genome wide  
51 association studies have identified several markers), wheat-related factors (age of ingestion, type  
52 and quantity of wheat) and the way gluten is metabolized in the intestine (5,6). About 30-40% of  
53 the gluten protein consists of glutamine and proline. Since humans are unable to enzymatically  
54 break the molecular bonds between these two amino-acids, many immunogenic peptides are  
55 produced (5). There remains a possibility that enzymes secreted by the small intestinal  
56 microbiota convert some of these immunogenic peptides to non-immunogenic peptides.

57 While 20-30% of individuals in many countries including India are genetic susceptibility to  
58 develop CeD and the majority of them are exposed to wheat, only 1% of them develop CeD.  
59 This brings forth the role of other factors such as the gut microbiota in the pathogenesis of CeD  
60 (7). Recently, numerous studies have highlighted the potential role of gut microbiota in  
61 inflammatory gastro-intestinal diseases (4,8–12,12–29).

62 Whether these changes in the microbial community structure and function in patients with CeD  
63 are cause or effect of the disease state however remains unclear to date. In order to answer this  
64 question, one has to examine the status of the gut microbiota in the pre-disease state. Such

65 observations have not yet been possible due to the lack of well-established animal models for  
66 CeD. While 70-80% percent of first-degree relatives (FDRs) of patients with CeD have  
67 HLA-DQ2/DQ8 haplotype (compared to 30% in the general population); only approximately  
68 8.5% of FDRs develop CeD (30). Thus, the question arises; Why do only few FDRs develop  
69 CeD and what is the role of the gut microbiome in disease protection? Indirect evidence of  
70 altered microbiota in relatives of patients with CeD is suggested by significantly lower levels of  
71 acetic and total short chain fatty acids, and higher fecal tryptic activity (31). Nevertheless, to date  
72 there is no information on the gut microbial composition and function in FDRs of patients with  
73 CeD, especially using the latest sequencing approaches. Additionally, it is important to explore  
74 the status of the microbiota in both the small intestine, the site of the disease, and faeces, as  
75 representative of whole gut microbiome.

76 To test the hypothesis that gut microbiome of FDR is different from CeD and could potentially  
77 play an important role in the pathogenesis of CeD, we explored the composition of both small  
78 intestinal and the whole gut microbiome using Illumina MiSeq in a subset of patients with CeD,  
79 first degree relatives and controls. We further investigated the potential microbial functions that  
80 are characteristic of FDR and CeD microbiota.

81

## 82 **Patients and Methods**

### 83 **Human subjects, duodenal biopsies and faecal sample collection**

84 A total of 62 subjects participated in this study including 23 treatment naïve patients with  
85 CeD [all HLA-DQ2/DQ8+, having high titre of anti-tissue transglutaminase antibodies (tTG Ab)  
86 and having villous abnormalities of modified Marsh grade 2 or more], 15 healthy first-degree  
87 relatives of patients with CeD [having normal titre of anti-tTG Ab and having no villous

88 abnormalities of modified Marsh grade 0 or 1], and 24 controls (patients with Hepatitis B Virus  
89 carriers or those having functional dyspepsia; having normal titre of anti-tTG Ab and having no  
90 villous abnormalities) (Table 1). Duodenal biopsies and faecal samples were collected from each  
91 of the above mentioned subjects at All India Institute of Medical Sciences, New Delhi, and sent  
92 to National Centre for Cell Sciences, Pune for microbiome analysis. The ethics committees of  
93 All India Institute of Medical Sciences, New Delhi, and National Centre for Cell Sciences, Pune,  
94 India approved the study. Informed and written consent was obtained from all the participants.  
95 Further details of patients and controls have been provided in the (Additional file 1: Table S1.

#### 96 **DNA extraction and 16S rRNA gene sequencing**

97 Total DNA was extracted from duodenal biopsies using QIAGEN DNeasy Blood and  
98 Tissue kit (QIAGEN, Germany) and faecal samples using the QIAamp fast DNA stool Mini Kit  
99 (QIAGEN, Germany) according to the manufacturer's instructions. We used Illumina MiSeq  
100 sequencing to determine the bacterial composition of the duodenal biopsies and faecal samples.  
101 PCR was set up in 50 µl reaction using AmpliTaq Gold PCR Master Mix (Life Technologies,  
102 USA) and with 16S rRNA V4 variable region specific bacterial primers 515F (5'-  
103 GTGCCAGCMGCCGCGGTAA-3') and 806R (5'-GGACTACHVGGGTWTCTAAT-3')

#### 104 **Bacterial community analysis**

105 QIIME (v1.8.0) was used to process the raw data files from the sequencer and construct  
106 the OTU table (32). Closed reference based OTU picking was used to cluster reads into OTUs at  
107 97% sequence similarity using the UCLUST algorithm and a representative sequence from each  
108 OTU was selected for downstream analysis. All OTUs were assigned to the lowest possible  
109 taxonomic rank by utilizing RDP Classifier 2.2 and Greengenes database 13.8 with a confidence  
110 score of at least 80% (33). The OTU table was filtered to remove OTUs belonging to

111 Mitochondria, Chloroplasts and Archaea. Alpha diversity and beta diversity analysis and  
112 composition analysis was done using the R-package phyloseq (v1.21) (34) and microbiome R  
113 package (v1.1.10008) (35). The alpha diversity measures were tested for significance using the  
114 Wilcoxon test for pairwise comparisons. OTU counts were transformed to relative abundance  
115 and Analysis of Similarities (ANOSIM) on Bray-Curtis distances was used to test for similarities  
116 in bacterial communities between sample types and diagnosis groups. Canonical correspondence  
117 analysis (CCA) was done separately on  $\log_{10}(1+X)$  transformed microbial count data for faecal  
118 and duodenal biopsy samples to test for differences between the different diagnosis groups.  
119 PERMANOVA was carried out using the adonis function in vegan package (v 2.4-4) to calculate  
120 significance of PCoA clustering based on the Bray-Curtis distances (36). We used DESeq2  
121 (v1.18.0) for identifying differentially abundant OTUs in pairwise comparisons between  
122 diagnosis groups (37). All OTUs that were significantly ( $\alpha = 0.01$ ) different in abundance  
123 between the diagnosis groups were reported and were adjusted for multiple comparisons using  
124 the Benjamini-Hochberg, false discovery rate procedure. Data was visualized using ggplot2 (v  
125 2.2.1) in R (34). All scripts and files to reanalyse microbiota profiling data from this study are  
126 available at <https://github.com/microsud/Gut-microbiota-Celiac-disease>.

127 **Predicted metagenome analysis:** We used PICRUSt to infer community gene content from 16S  
128 rRNA gene amplicon sequencing data, followed by STAMP to get significantly different  
129 predicted genes in diagnosis groups. For comparison of taxa contributions to the inferred  
130 metagenomes we used a recently developed tool, BURRITO (Browser Utility for Relating  
131 micRobiome Information on Taxonomy and functiOn) available from ([https://elbo-](https://elbo-spice.gs.washington.edu/shiny/burrito/)  
132 [spice.gs.washington.edu/shiny/burrito/](https://elbo-spice.gs.washington.edu/shiny/burrito/)).

## 133 **Results**

#### 134 **Characteristics of the study cohort:**

135 The characteristics of the study subjects have been summarized in the Table 1.

#### 136 **Comparison of faecal and duodenal microbial community in the study cohort**

137 Having both duodenal biopsies and faecal samples provided the opportunity to  
138 investigate differences in both site-specific and whole gut bacterial diversity and community  
139 structure in patients with CeD, FDRs and controls. The microbial community was significantly  
140 different between the faecal and duodenal biopsies irrespective of whether they were from CeD,  
141 FDR or DC groups (Fig. 1a, Analysis of similarities; Anosim test; R-statistic = 0.45, P-value =  
142 0.001). Hence, further analyses were carried out separately for faecal and duodenal samples in  
143 different groups.

144 Analysis of alpha diversity using Shannon index between the sampling sites suggested  
145 significant differences between the sampling sites (Wilcoxon test  $P < 0.05$ ). The duodenal  
146 biopsies showed larger inter-individual variation and consisted of samples with high and low  
147 diversity communities in all groups (Fig. 1b).

#### 148 **Site specific bacterial community structure in FDRs, CeD and controls**

149 *Duodenal and faecal microbiota composition and structure is distinct in FDRs, CeD and*  
150 *control groups:*

151 To investigate if patients with CeD, FDRs or DC had site specific dissimilarities in  
152 microbiota composition, we tested duodenal and faecal samples separately. Bray-Curtis distance  
153 for microbiota in duodenal biopsy was not different between CeD, FDRs or DC (Analysis of  
154 similarities; Anosim test; R-statistic = 0.02192,  $p = 0.202$ ). To analyse whether CeD and FDR  
155 have differences in microbial community, we performed PERMANOVA on ordination excluding

156 DC. Although there was no significant difference in total community ( $R^2 = 0.0608$ ,  $Pr(>F) =$   
157  $0.225$ ), we identified the top ten variable OTUs between CeD and FDR microbiota (Additional  
158 file 2: Figure S1). These included four OTUs classified as *Acinetobacter*, of which two (OTU-  
159 562618, OTU-543942) were associated with CeD, while the other two (OTU-1009894, OTU-  
160 988314) were associated with FDR. In addition, *Pseudomonas* (two OTUs), and  
161 *Stenotrophomonas* (one OTU) were associated with FDR. *Corynebacterium*, *Commamonas* and  
162 *Novosphingobium* were differentiating genera in CeD. Canonical correspondence analysis (CCA)  
163 constrained for diagnosis status revealed that the clustering of subjects was marginally different  
164 in the duodenal bacterial community from FDRs, CeD and controls ( $F = 1.185$ ,  $Pr(>F) = 0.031$  ,  
165 Fig. 2a). Bray-Curtis distances for microbiota in faeces were not different between CeD, FDRs  
166 or DC (Analysis of similarities; Anosim test; R-statistic = 0.032,  $p = 0.125$ ). In addition, the  
167 CCA analysis suggested no significant differences between faecal microbiota of FDRs, CeD and  
168 controls ( $F = 1.0704$ ,  $Pr(>F) = 0.154$ , Fig. 2b).

169         Alpha diversity measures were independently calculated for duodenal biopsies and faecal  
170 samples and compared between FDRs, CeD and controls (Fig. 3a and 3b). Pairwise comparisons  
171 of alpha diversity in duodenal biopsies between FDRs, CeD and controls suggested no  
172 significant differences (Fig. 3a). In faecal samples, pairwise comparison of alpha diversity  
173 demonstrated significant differences between FDR and CeD subjects (Wilcoxon test, FDR  
174 adjusted  $p = 0.029$ ) (Fig. 3b).

### 175 ***Taxonomic differences in microbiota from duodenal biopsies of FDRs CeD, and controls:***

176 At phylum level, there were no statistically significant differences in the major phyla  
177 (Proteobacteria, Firmicutes, Bacteroidetes and Verrucomicrobia) in the duodenal biopsies of  
178 FDRs, CeD and controls (Additional file 3: Figure S2), however, inter-individual variation



179 within the diagnosis groups was detected. At OTU level, after filtering out for low abundance  
180 OTUs (less than 5 counts in 50% of the samples in each group), CeD and FDR shared 124  
181 OTUs, CeD and DC shared 25 OTUs, FDR and DC shared 23 OTUs and a total of 447 were  
182 shared by all three groups (Additional file 4: Figure S3).

183 To further investigate OTUs that are different between the diagnosis groups, FDR vs DC,  
184 CeD vs DC and FDR vs CeD, we used the DESeq2 default parameters. The enriched OTUs  
185 described in the following section were significantly different between the groups (BH adjusted,  
186  $P < 0.01$ ).

#### 187 *Difference in OTUs between FDRs and DC in the duodenal biopsies*

188 In total, 52 OTUs belonging to 15 genera and one unclassified genera were identified as  
189 differentially abundant in between FDR and DC. Of these, four (*Streptococcus*, *Pseudomonas*,  
190 *Parvimonas* and *Acinetobacter*) were differentially abundant in FDR and 12 (*Sporosarcina*,  
191 *Planomicrobium*, *Planococcus*, *Lysinibacillus*, unclassified genus from Planococcaceae,  
192 *Enhydrobacter*, *Lactobacillus*, *Comamonas*, *Desemzia*, *Bacillus*, *Anoxybacillus*, and an  
193 unclassified genus were differentially abundant in DC (Fig. 4a).

#### 194 *Difference in OTUs between CeD and DC in the duodenal biopsies*

195 Comparison of duodenal microbiota of CeD with that of the controls identified 106  
196 differentially abundant OTUs associated with 22 genera. Amongst these, several OTUs from the  
197 genera *Acinetobacter*, Lactobacillaceae, *Corynebacter*, and one OTU each for *Prevoella* and  
198 *Pseudomoans* were abundant in CeD (Fig.4b).

#### 199 *Difference in OTUs between FDRs and CeD in the duodenal biopsies*

200 Comparison of FDR with CeD identified 41 OTUs belonging to 12 genera that were  
201 significantly different (Fig.4c). These included OTUs classified as genus *Streptococcus*,  
202 *Stenotrophomonas*, *Acinetobacter*, *Mogibacterium*, Enterococcaceae, *Atopobium*, unclassified  
203 Coriobacteriaceae, *Brevundimonas*, *Bacillus*, *Actinomyces* and *Parvimonas*, were abundant in  
204 FDR, other OTUs within *Acinetobacter* were abundant in CeD group. In addition, CeD had  
205 higher abundance of *Corynebacterium* and OTUs members of *Lactobacillaceae*.

#### 206 ***Taxonomic differences in the faecal microbiota in patients with CeD, FDRs and controls***

207 Similar to duodenal biopsies, at phylum level, there was not statistically significant  
208 difference in the major phyla (Proteobacteria, Firmicutes, Bacteroidetes and Verrucomicrobia) in  
209 fecal samples of patients with CeD, FDRs and controls. (Additional file 5: Figure S4). At OTU  
210 level, after filtering for low abundance OTUs (counts less than 5 in 50% of the samples in each  
211 group), CeD and FDR shared 1 OTU, CeD and DC shared 7 OTUs, FDR and DC shared 101  
212 OTUs and a total of 110 were shared by all three groups (Additional file 6: Figure S5).

#### 213 ***Differences in OTUs between FDRs and DC in faeces***

214 A total of 30 OTUs from 12 genera were differentially abundant between FDRs and DC.  
215 Among these, *Streptococcus*, *Prevotella* and *Acinetobacter* were abundant in DC, while  
216 *Ruminococcus*, unclassified Ruminococcaceae, *Pseudomonas*, *Lysinibacillus*, unclassified  
217 Planococcaceae, *Lactobacillus*, *Enterococcus*, unclassified Enterobacteriaceae, unclassified  
218 Coriobacteriaceae, *Comamonas*, *Bacteroides*, *Bacillus* and an unclassified genus were abundant  
219 in FDR (Fig. 5a).

#### 220 ***Differences in OTUs between CeD and DC in faeces***

221 Comparison of CeD and DC groups revealed a total of 86 OTUs from 12 genera that  
222 were differentially abundant. The OTUs classified to genus unclassified Planococcaceae  
223 *Weissella*, unclassified Coriobacteriaceae, unclassified Christensenellaceae, *Bacteroides* and  
224 *Bacillus* were abundant only in CeD. On the contrary, unclassified Clostridiaceae, unclassified  
225 Enterobacteriaceae *Coprococcus*, *Acinetobacter*, unclassified Peptostreptococcaceae,  
226 *Trabulsiella*, *Turicibacter*, unclassified Ruminococcaceae and unclassified genus were abundant  
227 in in DC (Fig. 5b).

#### 228 *Difference in OTUs between FDRs and CeD in faeces*

229 A total of 81 OTUs belonging to 13 genera including one unclassified genus were  
230 differentially abundant between FDR and CeD. Genus *Streptococcus*, *Prevotella*, unclassified  
231 Leuconostoceaceae, *Lactobacillus*, , unclassified Lachnospiraceae, *Eubacterium*  
232 (Erysipelotrichaceae), *Enterococcus*, unclassified Enterococcaceae, unclassified  
233 Enterobacteriaceae, *Collinsella*, *Bacteroides* and were abundant in CeD, while *Comamonas*,  
234 *Lysinibacillus*, *Serratia*, *SMB53*, *Trabulsiella*, unclassified Peptostreptococcaceae and  
235 unclassified Ruminococcaceae were abundant in FDR (Fig. 5c).

#### 236 **Imputed metagenome of FDR and CeD duodenal microbiome shows reduced proportion of** 237 **genes involved in gluten metabolism in comparison to that of the controls**

238 In addition to differentially abundant microbial taxa, different study groups might have  
239 altered microbial community functions by enriching or depleting taxa that encode specific  
240 metabolic modules. Of specific interest were the enzymes related to peptidases as they play a  
241 role in the breakdown of gliadin residues. For an overview of taxon contributions to this class of  
242 enzymes, we used a recently developed tool called BURRITO (Browser Utility for Relating  
243 micRobiome Information on Taxonomy and functiOn) (<https://elbo->

244 [spice.gs.washington.edu/shiny/burrito/](http://spice.gs.washington.edu/shiny/burrito/)). This tool employs PICRUSt to infer metagenome  
245 predictions using 16S rRNA gene data (38). The differential abundances of *Acinetobacter* and  
246 *Pseudomonas* were also correlated to the enrichment of peptidases in the total community (Fig.  
247 6).

248 The proportion of pyroglutamyl peptidase [3.4.19.3], subtilisin [3.4.21.62] and x-pro  
249 dipeptidase [3.4.13.9] genes which are involved in gluten degradation were reduced in FDRs and  
250 CeD as compared to controls (Fig. 7a,b,c). Moreover, aminopeptidase [3.4.11] was also reduced  
251 in FDRs and CeD (Fig. 7d).

252 Genes for beta-N-acetylhexosaminidase [3.2.1.52] and lysozyme [3.2.1.17] were  
253 predicted to occur in higher abundance in CeD than that in FDRs and DC (Additional file 7:  
254 Table S2). Higher proportions of beta-N-acetylhexosaminidase enzymes might cause or be the  
255 reflection of a weak mucosal barrier and indicate an enriched, mucolytic bacterial population.

256

## 257 **Discussion**

258 The aim of the present study was to investigate differences in the duodenal and faecal microbiota  
259 of FDRs compared to CeD and controls. The FDR group was included for two main reasons: 1)  
260 They represent a population which is genetically-susceptible to develop CeD; 2) They provide a  
261 unique opportunity to identify features of the host as well as of the associated microbiota that  
262 may be involved in the protection against developing CeD. We collected both duodenal biopsies  
263 and fecal samples to investigate both local and overall changes in the microbiota in FDR,  
264 patients with CeD and controls.

265           The differences in microbial diversity and community structure between the small  
266 intestinal microbiome represented by biopsy samples and whole gut microbiome represented by  
267 faecal samples were significant. To the best of our knowledge, reports on site specific microbiota  
268 patterns in patients with CeD remain scarce, and no results on both site specific and whole gut  
269 microbiome on FDRs have been reported to date. Present study provides an overall view on  
270 differences of both site-specific changes as well as changes in the faecal microbiota of FDRs,  
271 CeD and DC.

272           The duodenal microbial community structure of FDR is more similar to CeD than that of  
273 DC. In addition, both FDR and CeD individuals have high abundances of *Acinetobacter* and  
274 *Pseudomonas*. In addition, inferred genus-function relationship demonstrated these two genera to  
275 contribute to increased peptidases in the duodenal microbial community. Both *Acinetobacter* and  
276 *Pseudomonas* include opportunistic pathogenic species that are linked to inflammation (39,40).  
277 *Pseudomonas* is reported to be higher in children with CeD (41). On the other hand, the duodenal  
278 biopsies of FDR showed lower numbers of OTUs of *Lactobacillus* compared to DC and CeD. In  
279 a previous study, higher abundance of *Lactobacillus* was observed with higher glutenase activity  
280 in oral microbiome of patients with CeD (14). A lower number of *Lactobacillus* in FDRs in the  
281 present study may indicate their reduced ability to breakdown gluten into pro-inflammatory  
282 peptides in their small intestine. This is also supported to some extent by the observation of  
283 lower abundance of pyro-glutamyl peptidase [EC 3.4.19.3] in the predicted metagenome of the  
284 duodenal biopsies of FDR in the present study.

285           Interestingly, *Corynebacterium* was abundant in patients with CeD compared to both the  
286 FDR and DC (Fig. 4b and c). However, in the comparison between DC and FDR, abundance of  
287 *Corynebacterium* was not detected to be differentially abundant (Fig. 4a). Previously, the genus

288 *Corynebacterium* was reported to be present in high abundance in infants with higher risks for  
289 developing CeD (42). This suggests the need to further investigate the role of bacteria from this  
290 genus in CeD. Another observation is the higher abundance of OTUs of *Streptococcus* in FDR  
291 when compared to both the DC and CeD. Both *Lactobacillus* and *Streptococcus* are lactic acid  
292 bacteria and known to have peptidase activity to breakdown gliadin peptides (43). Further,  
293 mechanistic investigations will be necessary to ascertain, if there is a trade-off for abundance of  
294 specific strains of *Lactobacillus* or *Streptococcus* in subjects genetically susceptible to  
295 developing CeD. Another important difference between FDR and CeD is the higher abundance  
296 of *Actinomyces* in FDR. Specific strains of *Actinomyces* are shown to breakdown the highly  
297 immunogenic  $\alpha$ -gliadin 33-mer peptide (44). These observations suggest that the FDR and CeD  
298 duodenal microbiota differs in the bacterial composition and that loss or gain of specific bacteria  
299 capable of creating immunogenic or non-immunogenic gliadin peptides may be crucial.

300         Recently, a serine endopeptidase, subtilisin a novel class of gluten-degrading enzyme  
301 belonging to the S8 family of peptidases has been described. This enzyme is able to cleave and  
302 abolish gluten immunogenic epitopes (45). In this study, the gene proportion for this enzyme was  
303 found to be depleted in FDR as compared to the control. Moreover, genes coding for Xaa-Pro  
304 dipeptidase (EC:3.4.13.9) (prolidase) which assist in gluten degradation by splitting dipeptides  
305 with a prolyl residue in the carboxyl terminal position was reduced in FDR in comparison to that  
306 in controls. Also, gene proportion for aminopeptidase which may help in degradation of gluten  
307 was found to be decreased proportion in FDRs. In summary, results from differential taxa  
308 abundance analysis and predicted metagenome suggest that the microbiome in the small intestine  
309 of FDR might be different from that of CeD and DC in the way gluten is metabolized.

310 In the faecal samples, the alpha diversity indices of FDR and DC were more similar to  
311 each other compared to that of CeD. Higher diversity was observed in FDR compared to CeD (p  
312 = 0.034). In patients with active CeD, there is high inflammation in the intestine and such an  
313 environment is known to be strongly associated with reduced richness of microbial community  
314 (46,47). Higher diversity is often linked to higher resilience of the intestinal microbiome and a  
315 barrier to invasion by pathogenic species (47,48). The comparable and higher diversity of faecal  
316 microbiota in FDR and controls may suggest that the intestinal microbiota may act as a barrier to  
317 invasion of pro-inflammatory bacteria in FDRs.

318 In contrast to observations of duodenal biopsies, both FDR and CeD had lower  
319 abundance of *Acinetobacter* compared to DC in the faeces. However, *Pseudomonas* was  
320 abundant in FDR compared to DC. In addition, OTUs for *Bacillus* and *Bacteroides* were  
321 abundant in FDR and CeD. However, one specific OTU (OTU-535375) classified as *Bacteroides*  
322 *fragilis* was significantly abundant in CeD compared to FDR. Previously in *in-vitro* condition  
323 nine different strains of *B. fragilis* showed gliadin-hydrolysing activity and some of them  
324 generated immunogenic peptides that increased inflammatory cytokine production and showed  
325 increased ability to permeate through Caco-2 cell cultures (18). These observations suggest the  
326 need for investigating the role higher abundance of specific *Bacteroides fragilis* strains in CeD.

327 The FDR and DC do not show differences in abundance of many known and predicted  
328 butyrate, acetate and propionate producing bacteria from family Ruminococcaceae and  
329 Lachnospiraceae. However, CeD fecal microbiota has significantly low abundance of these  
330 compared to DC group. Reduction in butyrate producing bacteria was previously reported in  
331 inflammatory bowel disease (49).

332 This present study was conducted to investigate if the duodenal and faecal microbiota of  
333 FDR of CeD patients are different from that of controls and CeD. At microbial community level,  
334 the structure of FDR was more similar to CeD than that of DC. In fecal samples the FDR  
335 microbiota was characterised by higher species diversity. Several OTUs could differentiate  
336 microbiota of FDRs from that of CeD and DC. These OTUs belong to genera that are known to  
337 have different abilities to breakdown gluten as well as some with ability to produce butyrate.

338 We used 16S rRNA gene sequencing which gives sufficient power to obtain the  
339 microbial community profile (50). To investigate potential functions (specifically those related to  
340 gluten metabolism), we use predictive metagenomics (38). Our observations from beta diversity  
341 (Additional file 1: Figure S1) and differential abundance (Figure 4 and 5) suggests variation at  
342 taxonomic levels lower than genus. These potential strain level variations and functional aspects  
343 using metagenomics and functional omics need to be investigated in follow-up studies. However,  
344 metagenomics studies of biopsy samples remain a challenge because of high proportion of host  
345 DNA. Thus, predictive metagenomics using 16S rRNA gene as a practical solution was  
346 employed for biopsies. In this initial exploratory study, we investigated the gut microbiome with  
347 respect to the disease status only and future studies considering other confounding factors such  
348 as diet, body mass index age, sex, frequency and quantity of gluten intake among others will be  
349 required for a better understanding the gut microbiome in CeD and FDRs. Nonetheless, the study  
350 provides support to the emerging view that the gut microbiome and its function could possibly  
351 have a pivotal role in the etiopathogenesis of CeD.

352 In summary, present study highlights the specific differences in the microbiota of FDR  
353 compared to that in patients with CeD and controls. Difference in FDR microbiota in both the  
354 faecal and duodenal biopsy samples compared to CeD and DC suggests microbiota of FDR have



355 unique features. These unique features should be addressed in future mechanistic studies to  
356 understand etiopathogenesis of CeD.

357

### 358 **List of abbreviations**

359 **CeD**: Celiac disease, **DC**: Diseased controls (dyspeptic), **FDR**: First degree relatives. **OTU**:  
360 Operational taxonomic unit, **PERMANOVA**: Permutational multivariate analysis of variance,  
361 **rRNA**: Ribosomal Ribonucleic acid, **PCoA**: Principal coordinates analysis, **CCA**: Canonical  
362 correspondence analysis.

### 363 **Declarations**

### 364 **Acknowledgement**

365 We acknowledge the help of Aishwairya Sharma, a dietician, who counselled the patients  
366 for gluten free diet. The authors are grateful to Dr. Nachiket Marathe for fruitful discussion  
367 related to the project. The authors thank Johanna Gutleben for proofreading the manuscript. We  
368 sincerely acknowledge the support of each participant of this study who accepted to participate in  
369 this study.

### 370 **Funding**

371 We acknowledge the support of the Food and Nutrition Division of Department of  
372 Biotechnology, Government of India who provided the research grant for this study (Sanction no  
373 BT/PR-14956/FNS/20/497/2010).

### 374 **Availability of data and materials**

375 Sequence data generated in this study is available from the NCBI Sequence Read Archive  
376 within the Bioproject ID accession PRJNA385740.  
377 (<https://www.ncbi.nlm.nih.gov/bioproject/?term=PRJNA385740>) and to reproduce the analysis

378 done in R, the R Markdown file and required data are available at  
379 <https://github.com/microsud/Gut-microbiota-Celiac-disease>.

380 **Conflicts of interest:** All the authors disclose no conflict of interest

381 **Authors Contributions:**

382 The research study was conceptualized, designed and supervised by GKM, YSS and VA. Patient  
383 recruitment, diagnosis and endoscopic examination was done by GKM; HLA testing was done  
384 by GK; biological sample collection (duodenal biopsy/stool) storage and maintenance was done  
385 by AKV, KB and AM. The extraction of genomic DNA was done by RB and PP. DKB, BPS and  
386 RCP were involved in amplicon sequencing. Bioinformatics analysis for amplicon data was done  
387 by SAS, DPD and RB. Data acquisition, data interpretation and drafting of the manuscript was  
388 done by SAS and GKM. YSS, DPD and VA critically reviewed the manuscript. All authors have  
389 read and approved the final manuscript.

390 **Ethics approval and consent to participate**

391 The Ethics Committees of All India Institute of Medical Sciences, New Delhi, and National  
392 Centre for Cell Sciences, Pune, India approved the study. Informed and written consent was  
393 obtained from all the participants.

394 **Consent for publication**

395 Not applicable.

396 **Competing interests**

397 The authors declare that they have no competing interests.

398 **References:**

- 399 1. Singh P, Arora A, Strand TA *et al.* Global prevalence of celiac disease: Systematic review  
400 and Meta-analysis. *Clin Gastroenterol Hepatol* (In press).
- 401 2. Makharia GK, Verma AK, Amarchand R *et al.* Prevalence of celiac disease in the  
402 northern part of India: A community based study. *J Gastroenterol Hepatol.* 2011;26:894–  
403 900.
- 404 3. Caminero A, Nistal E, Herrán AR *et al.* Differences in gluten metabolism among healthy  
405 volunteers, coeliac disease patients and first-degree relatives. *Br J Nutr.* 2015;114:1157–  
406 67.
- 407 4. Sanz Y, Pama G De. Unraveling the Ties between Celiac Disease and Intestinal  
408 Microbiota. *Int Rev Immunol.* 2011;30:207–18.
- 409 5. Kagnoff MF, Kagnoff MF, Green PH *et al.* Celiac disease: pathogenesis of a model  
410 immunogenetic disease. *J Clin Invest.* 2007;117:41–9.
- 411 6. Jabri B, Sollid LM. Mechanisms of Disease: immunopathogenesis of celiac disease. *Nat*  
412 *Clin Pract Gastroenterol Hepatol.* 2006;3:516–25.
- 413 7. Sánchez E, Donat E, Ribes-Koninckx C *et al.* Intestinal Bacteroides species associated  
414 with coeliac disease. *J Clin Pathol.* 2010;63:1105–11.
- 415 8. Mohan M, Chow CET, Ryan CN *et al.* Dietary Gluten-Induced Gut Dysbiosis Is  
416 Accompanied by Selective Upregulation of microRNAs with Intestinal Tight Junction and  
417 Bacteria-Binding Motifs in Rhesus Macaque Model of Celiac Disease. *Nutrients.*  
418 2016;8:684.

- 419 9. Sánchez E, Donat E, Ribes-Koninckx C *et al.* Duodenal-mucosal bacteria associated with  
420 celiac disease in children. *Appl Environ Microbiol.* 2013;79:5472–9.
- 421 10. Tjellström B, Stenhammar L, Högberg L *et al.* Gut microflora associated characteristics in  
422 children with celiac disease. *Am J Gastroenterol.* 2005;100:2784–8.
- 423 11. de Sousa Moraes LF, Grzeskowiak LM, de Sales Teixeira TF *et al.* Intestinal microbiota  
424 and probiotics in celiac disease. *Clin Microbiol Rev.* 2014;27:482–9.
- 425 12. Nistal E, Caminero A, Vivas S *et al.* Differences in faecal bacteria populations and faecal  
426 bacteria metabolism in healthy adults and celiac disease patients. *Biochimie.*  
427 2012;94:1724–9.
- 428 13. Collado MC, Calabuig M, Sanz Y. Differences between the fecal microbiota of coeliac  
429 infants and healthy controls. *Curr Issues Intest Microbiol.* 2007;8:9–14.
- 430 14. Tian N, Faller L, Leffler DA *et al.* Salivary gluten degradation and oral microbial profiles  
431 in healthy individuals and celiac disease patients. *Appl Environ Microbiol.* 2017;83:  
432 e03330-16.
- 433 15. Francavilla R, Ercolini D, Piccolo M *et al.* Salivary microbiota and metabolome associated  
434 with celiac disease. *Appl Environ Microbiol.* 2014;80:3416–25.
- 435 16. Golfetto L, Senna FD de, Hermes J *et al.* Lower Bifidobacteria Counts in Adult Patients  
436 With Celiac Disease on a Gluten-Free Diet. *Arq Gastroenterol.* 2014;51:139–43.
- 437 17. Cheng J, Kalliomäki M, Heilig HG *et al.* Duodenal microbiota composition and mucosal  
438 homeostasis in pediatric celiac disease. *BMC Gastroenterol.* 2013;13:113.

- 439 18. Sánchez E, Laparra JM, Sanz Y. Discerning the role of bacteroides fragilis in celiac  
440 disease pathogenesis. *Appl Environ Microbiol.* 2012;78:6507–15.
- 441 19. Béres NJ, Sziksz E, Vannay Á *et al.* Role of the Microbiome in Celiac Disease. *Int J*  
442 *Celiac Dis* Attila J Szabó, Gábor Veres *Int J Celiac Dis.* 2014;2:150–3.
- 443 20. Kopečný J, Mrázek J, Fliegerová K *et al.* The intestinal microflora of childhood patients  
444 with indicated celiac disease. *Folia Microbiol.*2008;53:214–6.
- 445 21. Pisarello MLJ, Vintiñi EO, González SN *et al.* Decrease in lactobacilli in the intestinal  
446 microbiota of celiac children with a gluten-free diet, And selection of potentially probiotic  
447 strains. *Can J Microbiol.* 2015;61:32–7.
- 448 22. Caminero A, Herrán AR, Nistal E *et al.* Diversity of the cultivable human gut microbiome  
449 involved in gluten metabolism: isolation of microorganisms with potential interest for  
450 coeliac disease. *FEMS Microbiol Ecol.* 2014;88:309–19.
- 451 23. Sánchez E, De Palma G, Capilla A *et al.* Influence of environmental and genetic factors  
452 linked to celiac disease risk on infant gut colonization by Bacteroides species. *Appl*  
453 *Environ Microbiol.* 2011;77:5316–23.
- 454 24. Nylund L, Kaukinen K, Lindfors K. The microbiota as a component of the celiac disease  
455 and non-celiac gluten sensitivity. *Clin Nutr Exp.* 2016;6:17–24.
- 456 25. Schippa S, Iebba V, Barbato M *et al.* A distinctive “microbial signature” in celiac  
457 pediatric patients. *BMC Microbiol.* 2010;10:175.
- 458 26. D’Argenio V, Casaburi G, Precone V *et al.* Metagenomics Reveals Dysbiosis and a  
459 Potentially Pathogenic *N. flavescens* Strain in Duodenum of Adult Celiac Patients. *Am J*

- 460 Gastroenterol. 2016;111:879-90.
- 461 27. Anania C, Olivero F, Olivero E *et al.* Probiotics in Childhood Celiac Disease. In: World  
462 <sup>TM</sup> s largest Science , Technology & Medicine Open Access book publisher Probiotics  
463 in Childhood Celiac Disease. 2016;95:223–39.
- 464 28. Nadal I, Donant E, Ribes-Koninckx C *et al.* Imbalance in the composition of the duodenal  
465 microbiota of children with coeliac disease. J Med Microbiol. 2007;56:1669–74.
- 466 29. Hedberg ME, Israelsson A, Moore ERB *et al.* *Prevotella jejuni* sp. nov., isolated from the  
467 small intestine of a child with coeliac disease. Int J Syst Evol Microbiol. 2013;63:4218–  
468 23.
- 469 30. Singh P, Arora S, Lal S *et al.* Risk of Celiac Disease in the First- and Second-Degree  
470 Relatives of Patients With Celiac Disease: A Systematic Review and Meta-Analysis. Am J  
471 Gastroenterol. 2015;110:1539–48.
- 472 31. Tjellström B, Stenhammar L, Högberg L *et al.* Gut microflora associated characteristics in  
473 first-degree relatives of children with celiac disease. Scand J Gastroenterol.  
474 2007;42:1204–8.
- 475 32. Caporaso JG, Kuczynski J, Stombaugh J *et al.* QIIME allows analysis of high-throughput  
476 community sequencing data. Nat Methods. 2010;7:335–6.
- 477 33. Wang Q, Garrity GM, Tiedje JM *et al.* Naive Bayesian Classifier for Rapid Assignment of  
478 rRNA Sequences into the New Bacterial Taxonomy. Appl Environ Microbiol.  
479 2007;73:5261–7.
- 480 34. McMurdie PJ, Holmes S. Phyloseq: An R Package for Reproducible Interactive Analysis

- 481 and Graphics of Microbiome Census Data. Watson M, editor. PLoS One. 2013 Apr  
482 22;8:e61217.
- 483 35. Leo L, Shetty S. microbiome R package. Bioconductor. 2017.
- 484 36. Dixon P. VEGAN, a package of R functions for community ecology. Vol. 14, Journal of  
485 Vegetation Science. 2003;14:927–30.
- 486 37. Love MI, Huber W, Anders S. Moderated estimation of fold change and dispersion for  
487 RNA-seq data with DESeq2. Genome Biol. 2014;15:550.
- 488 38. Langille MGI, Zaneveld J, Caporaso JG *et al.* Predictive functional profiling of microbial  
489 communities using 16S rRNA marker gene sequences. Nat Biotechnol. 2013;31:814–21.
- 490 39. Thierry P, Mulet C, Catherine D. A Crypt-Specific Core Microbiota Resides in the Mouse  
491 Colon Thierry. MBio. 2012;3:e00116-12.
- 492 40. Hakansson A, Molin G. Gut microbiota and inflammation. Nutrients. 2011;3:637–82.
- 493 41. Cheng J, Kalliomäki M, Heilig HG *et al.* Duodenal microbiota composition and mucosal  
494 homeostasis in pediatric celiac disease. BMC Gastroenterol. 2013;13:113.
- 495 42. Olivares M, Neef A, Castillejo G *et al.* The HLA-DQ2 genotype selects for early intestinal  
496 microbiota composition in infants at high risk of developing coeliac disease. Gut.  
497 2015;64:406–17.
- 498 43. Montserrat CA, Andreu CM, Ramon VD *et al.* Lactic acid bacteria for coeliac  
499 disease.2011; US Patents:US20130121976 A1.
- 500 44. Fernandez-Feo M, Wei G, Blumenkranz G *et al.* The cultivable human oral gluten-

- 501 degrading microbiome and its potential implications in coeliac disease and gluten  
502 sensitivity. *Clin Microbiol Infect.* 2013;19:E386-94.
- 503 45. Wei G, Tian N, Siezen R *et al.* Identification of food-grade subtilisins as gluten-degrading  
504 enzymes to treat celiac disease. *Am J Physiol - Gastrointest Liver Physiol.*  
505 2016;311:G571–80.
- 506 46. Gevers D, Kugathasan S, Denson LA *et al.* The treatment-naive microbiome in new-onset  
507 Crohn’s disease. *Cell Host Microbe.* 2014;15:382–92.
- 508 47. Shetty SA, Hugenholtz F, Lahti L *et al.* Intestinal microbiome landscaping: Insight in  
509 community assemblage and implications for microbial modulation strategies. *FEMS*  
510 *Microbiol Rev.* 2017;41:182–99.
- 511 48. Levine JM, D’Antonio CM. Elton Revisited: A Review of Evidence Linking Diversity and  
512 Invasibility. *Oikos.* 1999;87:15.
- 513 49. Wang W, Chen L, Zhou R *et al.* Increased proportions of Bifidobacterium and the  
514 Lactobacillus group and loss of butyrate-producing bacteria in inflammatory bowel  
515 disease. *J Clin Microbiol.* 2014;52:398–406.
- 516 50. Walters W, Hyde ER, Berg-lyons D *et al.* Improved Bacterial 16S rRNA Gene (V4 and  
517 V4-5) and Fungal Internal Transcribed Spacer Marker Gene Primers for Microbial  
518 Community Surveys. *mSystems.* 2015;1:e0009-15.
- 519  
520  
521



522 **Table 1: Demographic characteristics on study subjects**

| Features                                               |                | Groups     |           |           |
|--------------------------------------------------------|----------------|------------|-----------|-----------|
|                                                        |                | CeD        | FDR       | DC        |
| Number of subjects                                     |                | 23         | 15        | 24        |
| Age (mean±S.D.)                                        |                | 23.4±9.5   | 31.6±10.8 | 30.6±12.3 |
| Gender                                                 | Male           | 10         | 6         | 22        |
|                                                        | Female         | 13         | 9         | 2         |
| Sampling site                                          | Faecal samples | 21         | 15        | 23        |
|                                                        | Biopsy samples | 16         | 13        | 14        |
| Villous abnormalities (as per Modified Marsh criteria) | 0              | -          | 15        | 22        |
|                                                        | 1              | -          | -         | 2         |
|                                                        | 3a             | 2          | -         | -         |
|                                                        | 3b             | 7          | -         | -         |
|                                                        | 3c             | 14         | -         | -         |
| HLA DQ2/DQ8+                                           |                | 23         | 13        | 6         |
| tTG Titre (mean±S.D.)                                  |                | 199.9±72.1 | 4.36±2.6  | 4.09±2.8  |

523

524 **Abbreviations:** CeD: Celiac disease patients; FDR: First degree relatives of CeD; DC: control

525 subject; tTG: tissue transglutaminase.

526

527 **Figure Legends**

528 **Figure 1: Community wide differences in beta and alpha diversity. a.** Principal coordinates  
529 analysis (PCoA) of bacterial diversity based on Bray–Curtis distance. **b.** Comparison of alpha  
530 diversity measures between sampling sites (Wilcoxon test was used for pairwise comparisons).

531

532 **Figure 2: Constrained ordination of individuals using CCA with diagnosis as constraint a.**  
533 Duodenal biopsies. **b.** Faecal samples.

534

535 **Figure 3: Comparison of alpha diversity between diagnosis groups. a.** Duodenal biopsy. **b.**  
536 Faecal samples. Wilcoxon test was used for statistical comparison.

537

538 **Figure 4: Comparison of differential abundance of bacterial taxa between the diagnosis**  
539 **groups in biopsy samples. a.** Differential abundance DC vs FDR **b.** Differential abundance  
540 CeD vs DC **c.** Differential abundance CeD vs FDR. Only genera with significant differences ( $P <$   
541  $0.01$ ) in  $\log_2$  fold change are depicted.

542

543 **Figure 5: Comparison of differential abundance of bacterial taxa between the diagnosis**  
544 **groups in faecal samples. a.** Differential abundance DC vs FDR. **b.** Differential abundance  
545 CeD vs DC. **c.** Differential abundance CeD vs FDR. Only genera with significant differences ( $P <$   
546  $0.01$ ) in average  $\log_2$  fold change are depicted.

547

548 **Figure 6: Inferred genus-function relationships across duodenal biopsies demonstrating higher**  
549 contribution of *Acinetobacter* and *Pseudomonas* to peptidase abundances in the total community.

550 **Figure 7: Comparison of proportion of sequence percentage of specific genes related to**  
551 **gluten metabolism by bacteria inferred from predicted metagenome for duodenal biopsy. a.**  
552 **pyroglutamyl peptidase [EC 3.4.19.3] b. Subtilisin [3.4.21.62] c. X-Pro dipeptidase [3.4.13.9] d.**  
553 **Aminopeptidase [EC 3.4.11].**

554

555 **Additional file, Figure S1:** Coefficients for the top OTUs separating CeD and FDR microbiota  
556 (PERMANOVA,  $R^2 = 0.03063$ ,  $\Pr(>F) = 0.45$ ). Top half (Red) are OTUs characteristics of CeD  
557 group while bottom half (lavender) are OTUs characteristics of FDR group.

558

559 **Additional file, Figure S2:** Comparison of top four bacterial phyla in duodenal biopsy.  
560 Wilcoxon test was used for statistical comparison.

561

562 **Additional file, Figure S3:** Venn Diagram depicting shared and unique OTUs in duodenal  
563 biopsies between FDR, CeD and DC.

564

565 **Additional file, Figure S4:** Comparison of top four bacterial phyla in faeces. Wilcoxon test was  
566 used for statistical comparison.

567

568 **Additional file, Figure S5:** Venn Diagram depicting shared and unique OTUs in faeces between  
569 FDR, CeD and DC.

**a**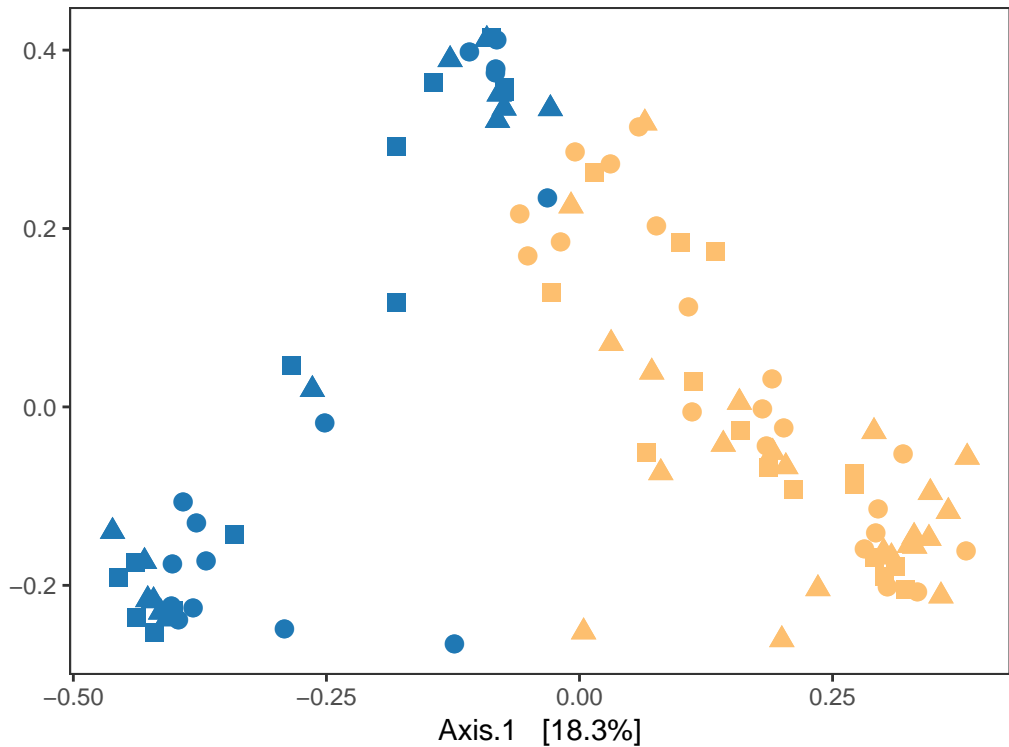**b**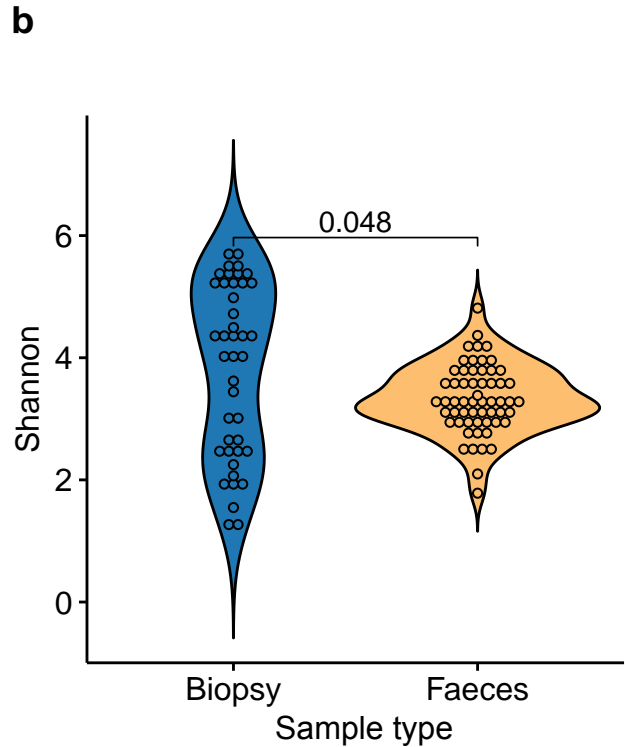

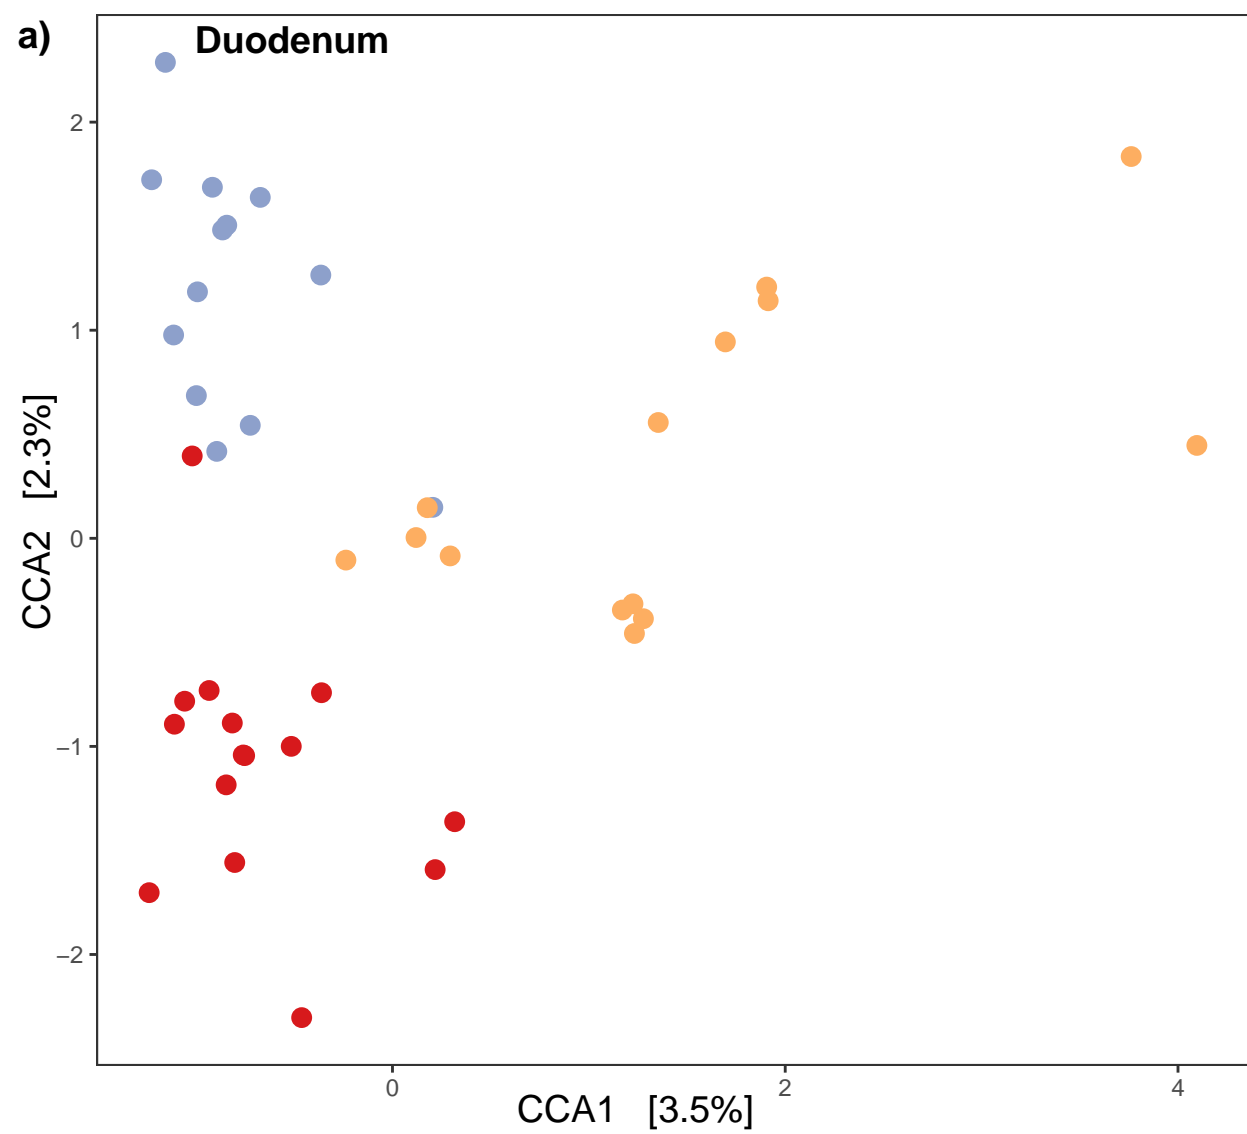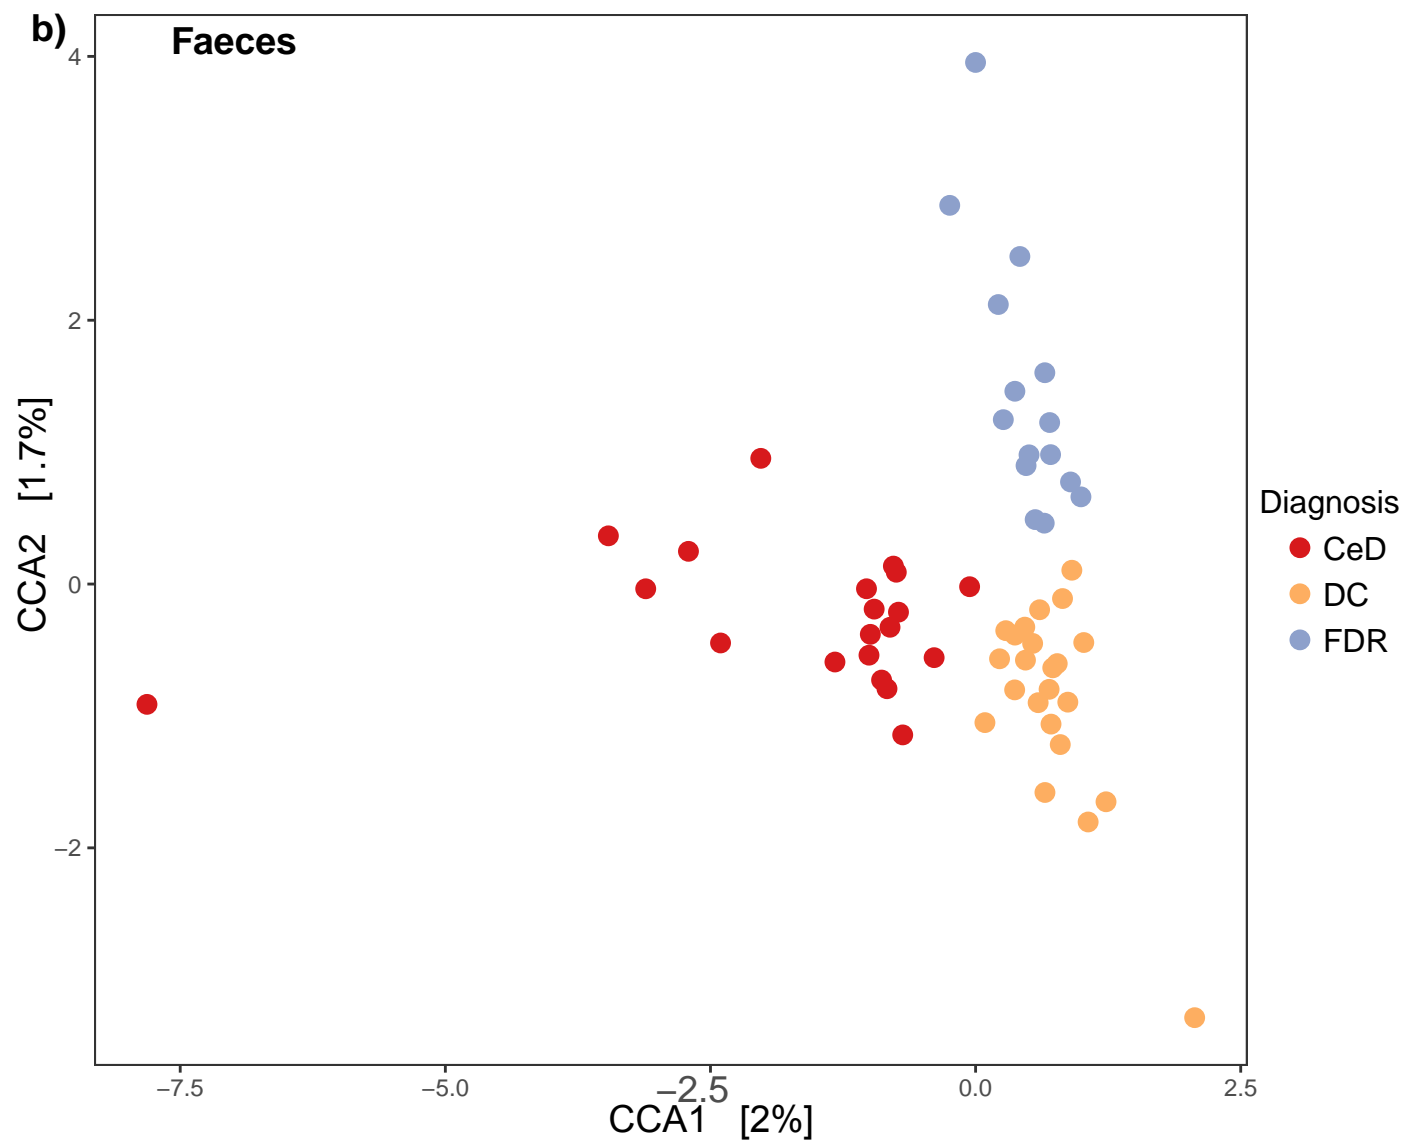

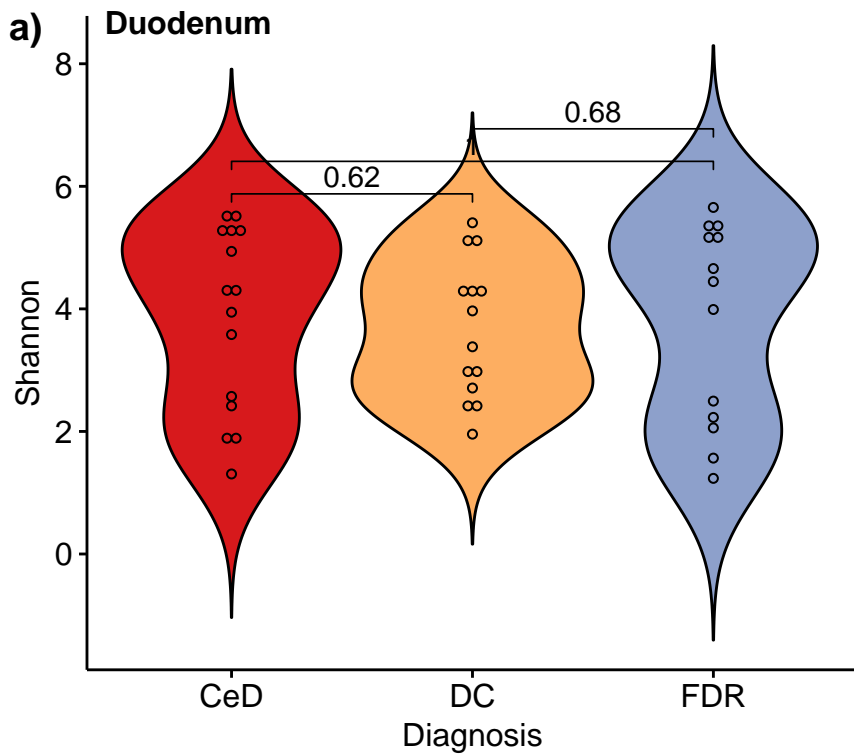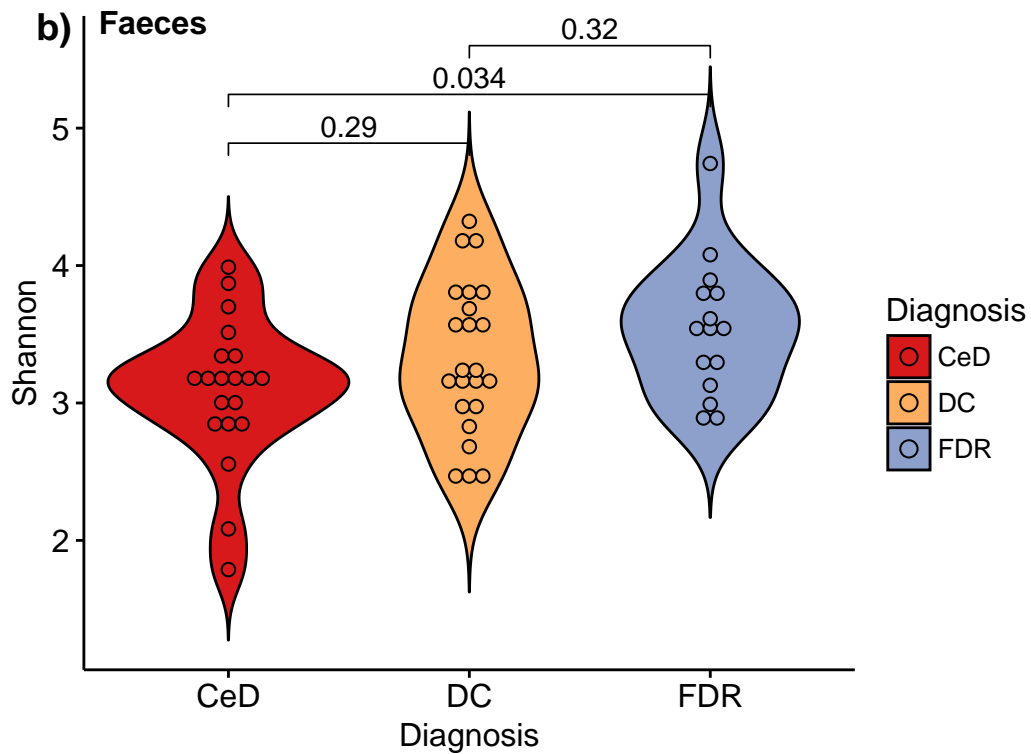

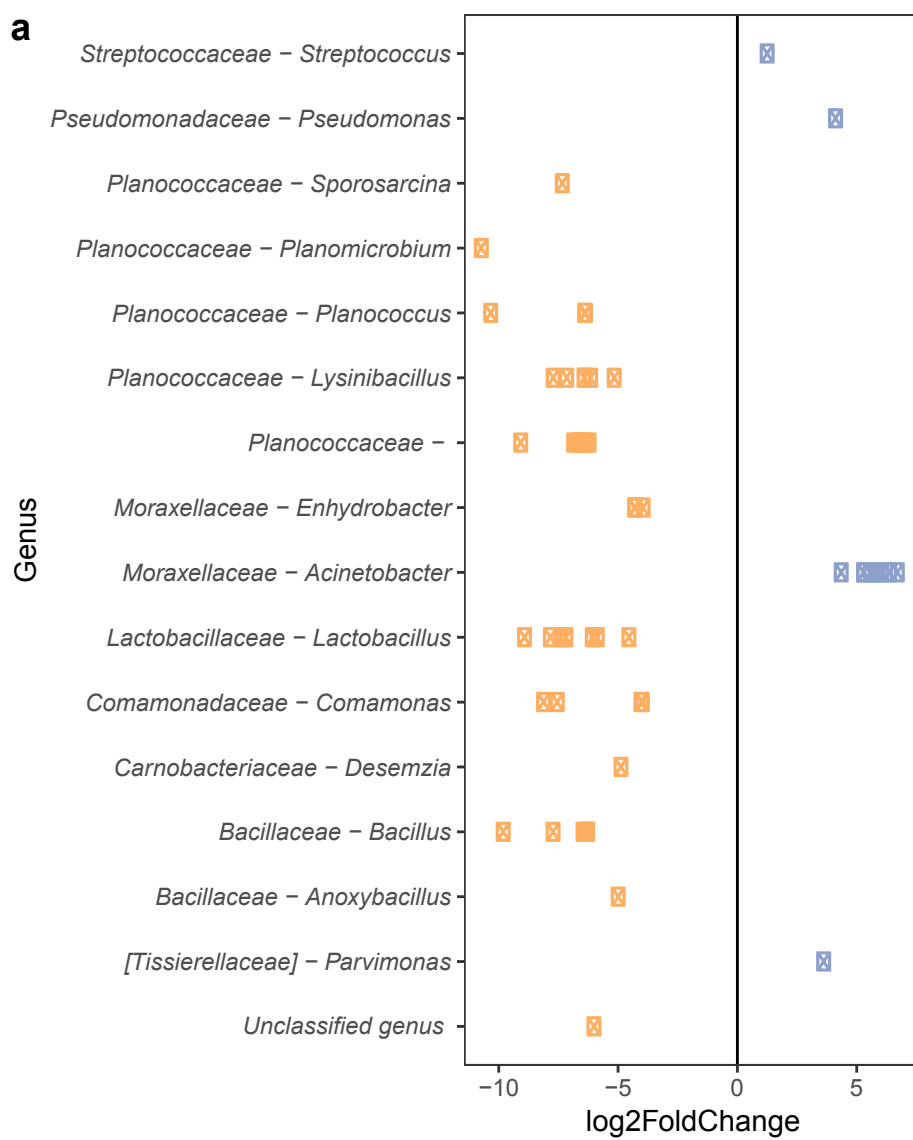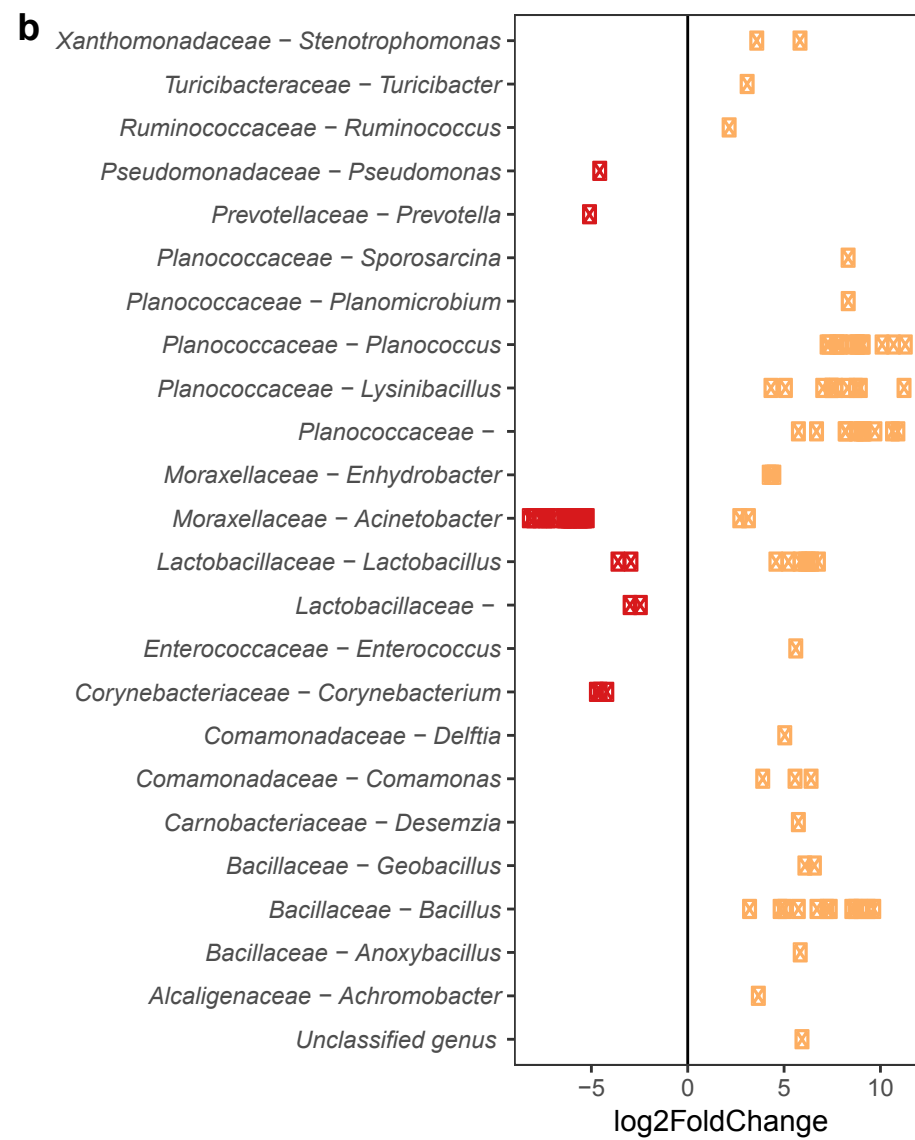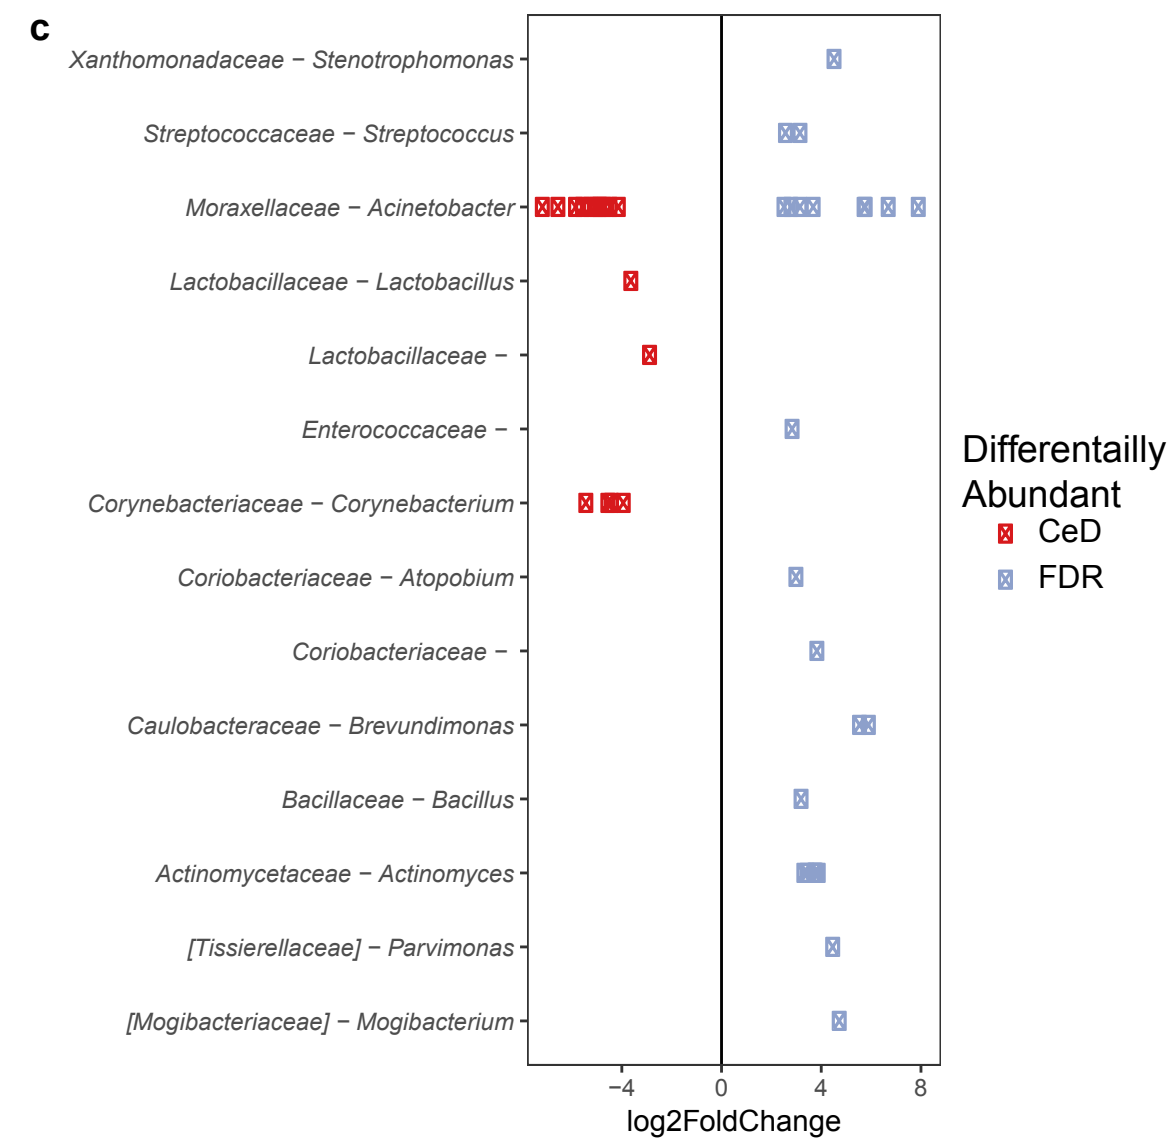

**a**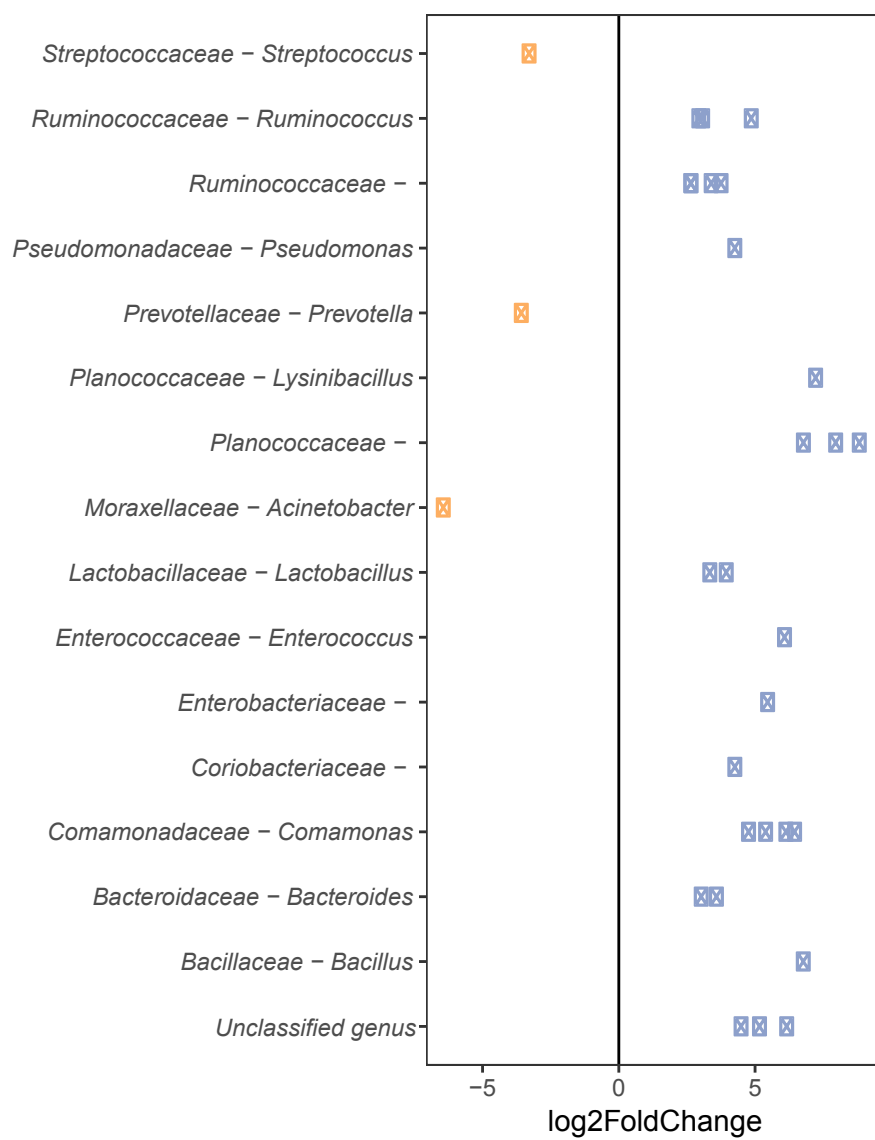**b**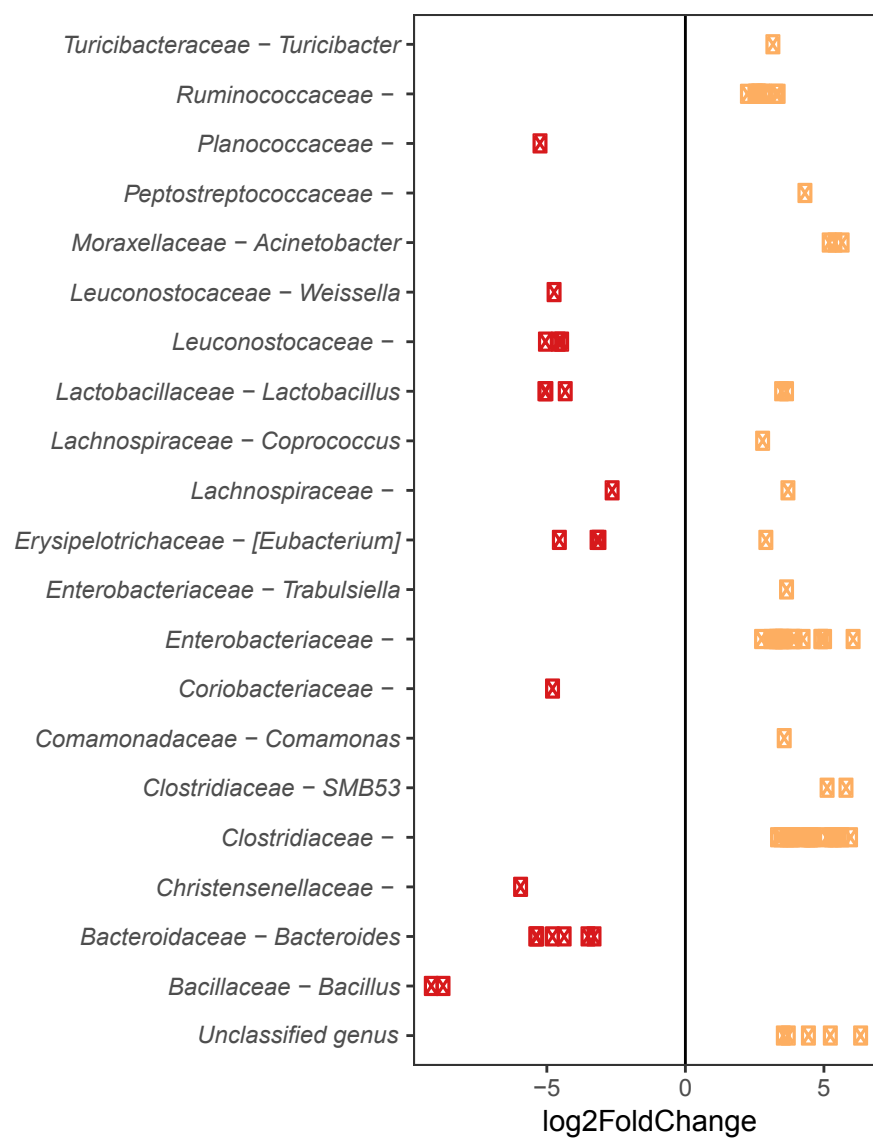**c**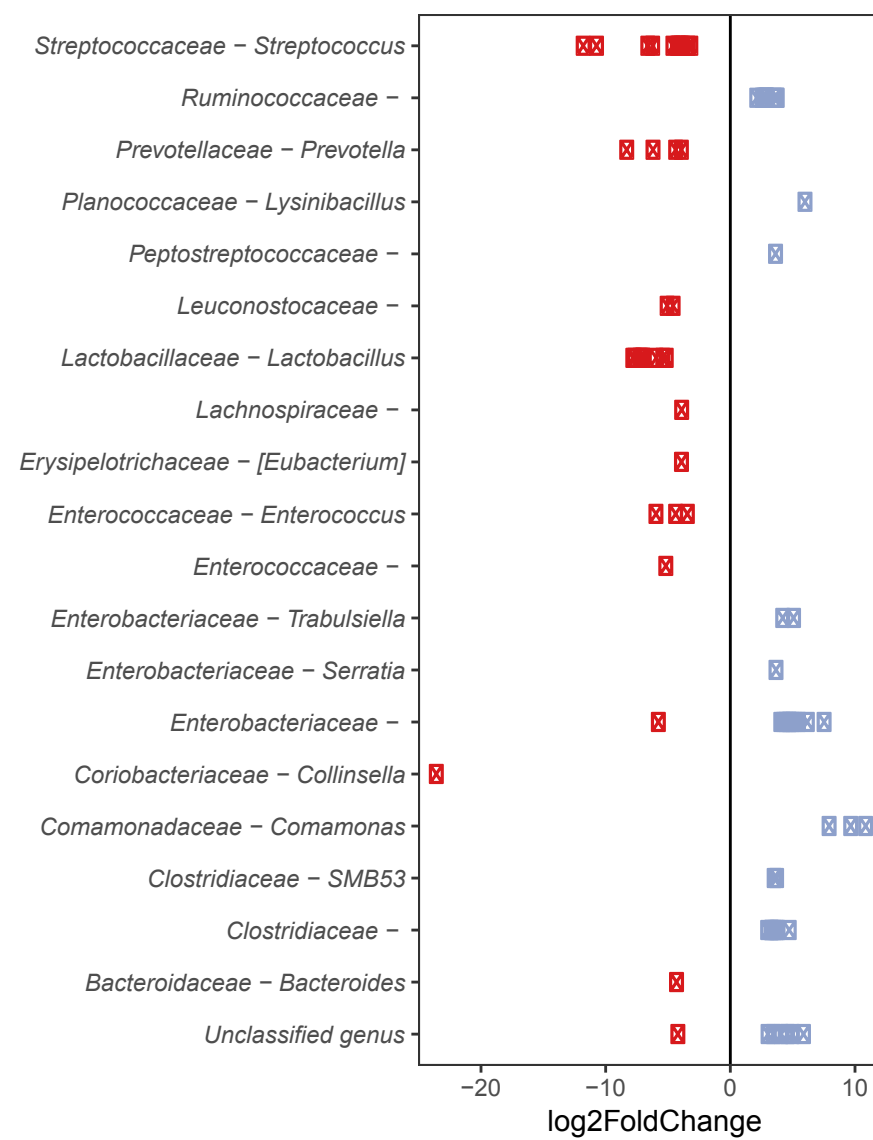



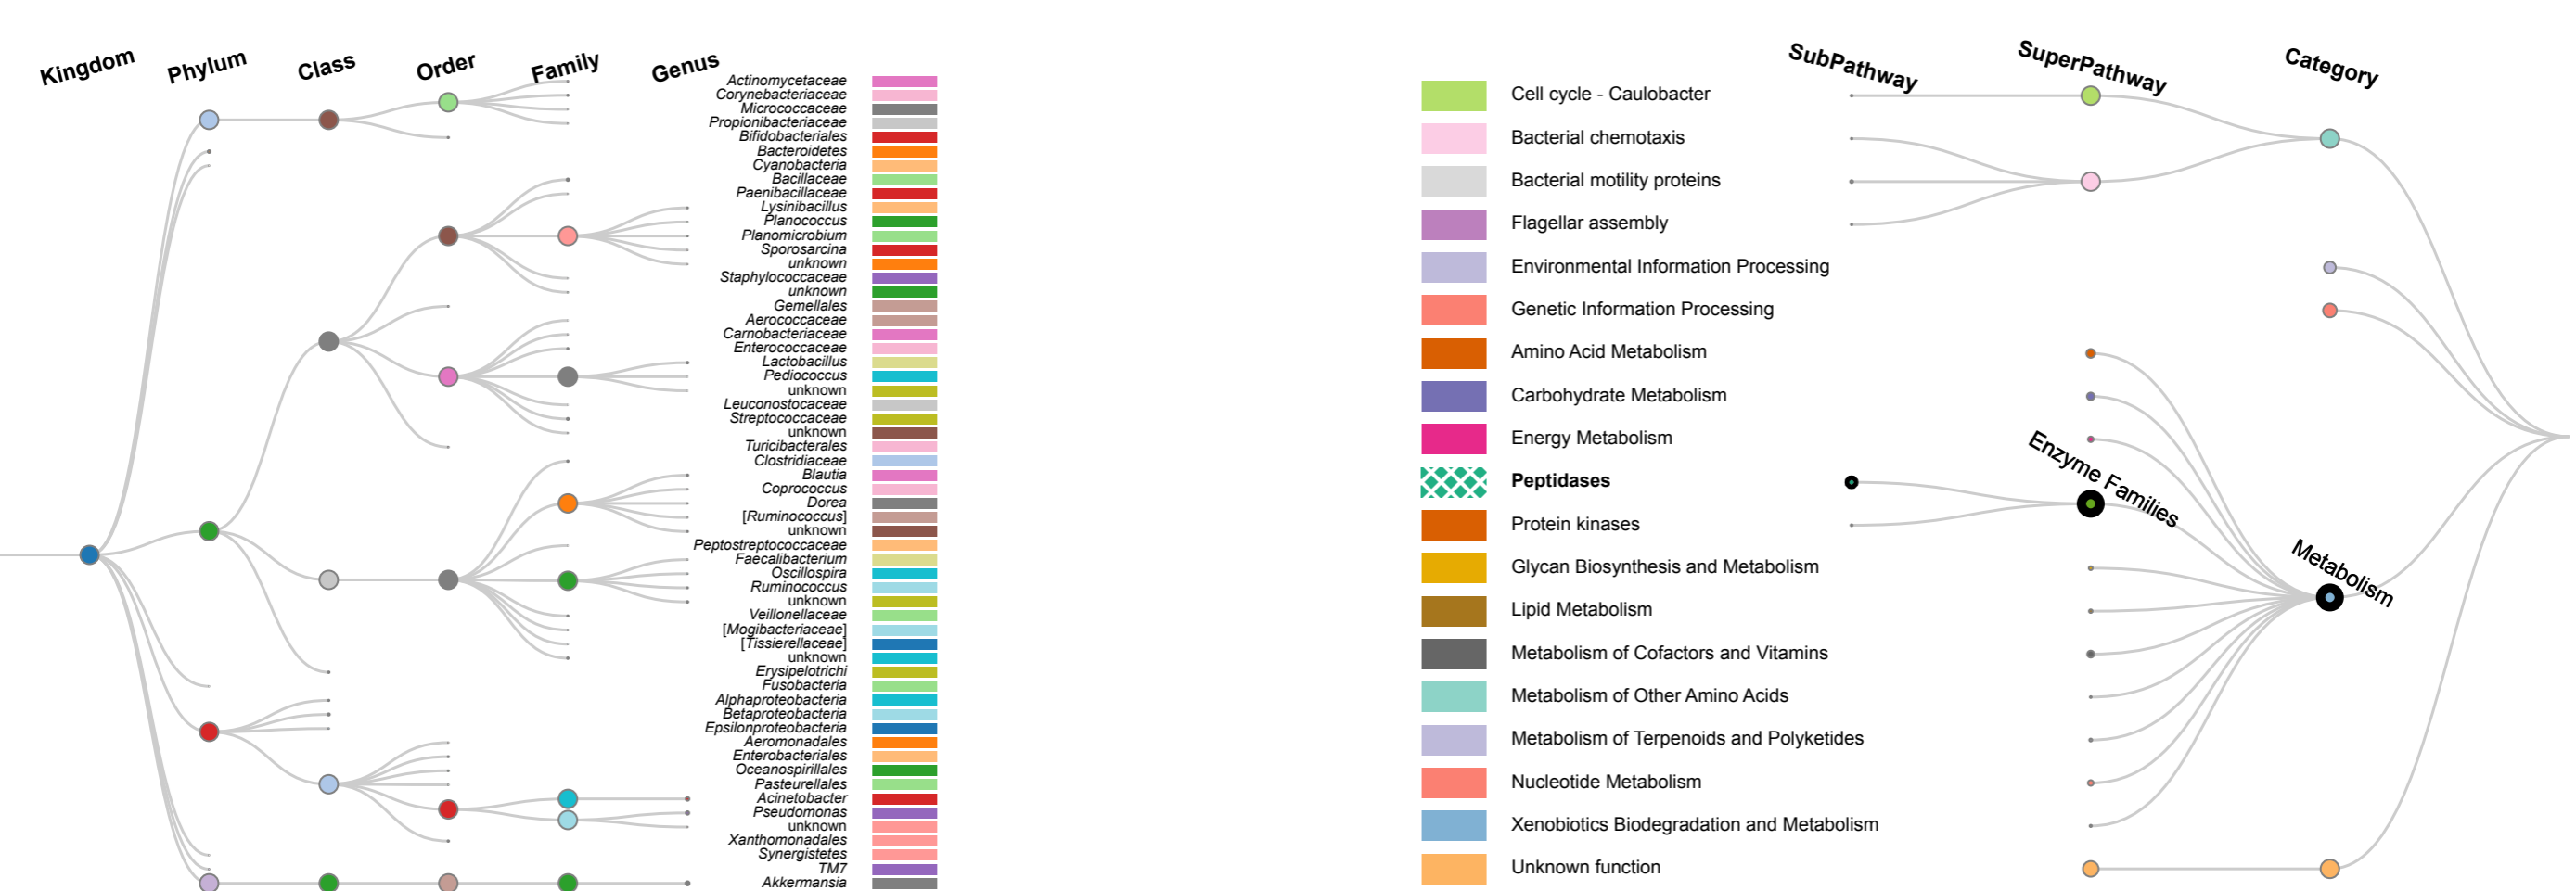

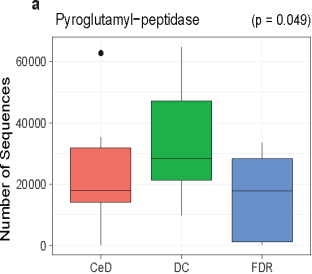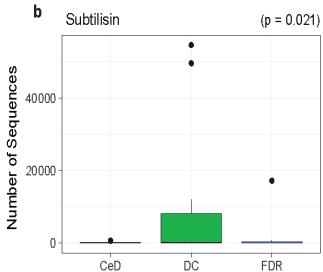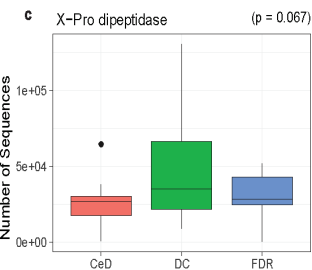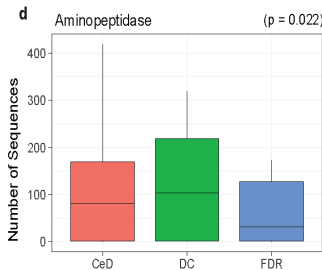

Diagnosis:  CeD  DC  FDR

# Top OTUs

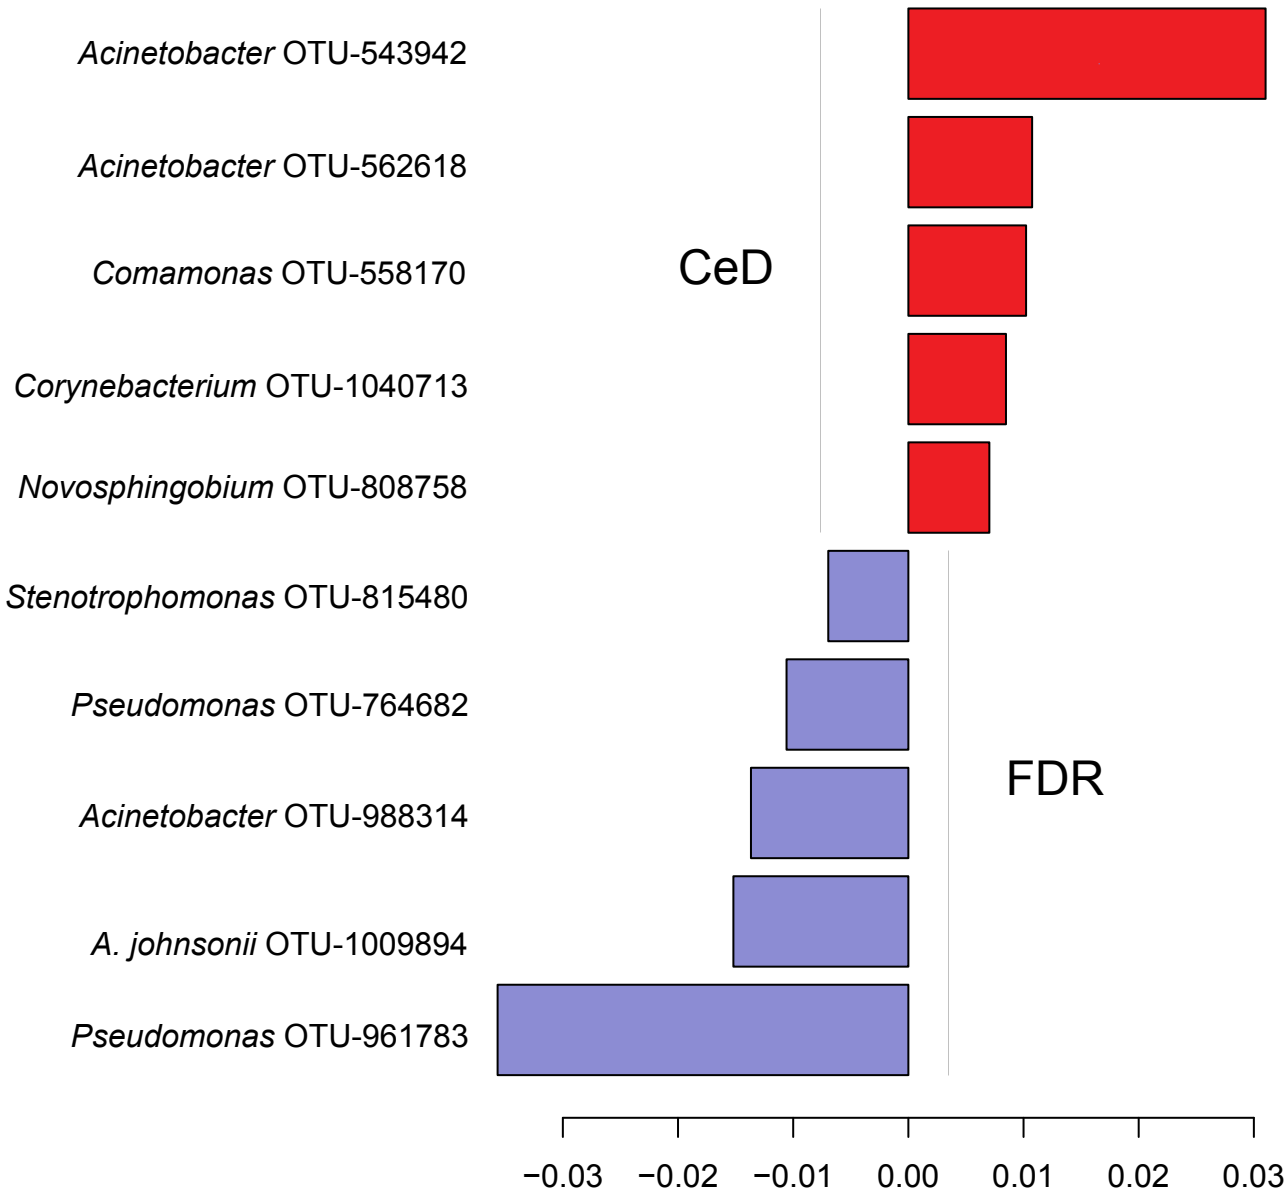

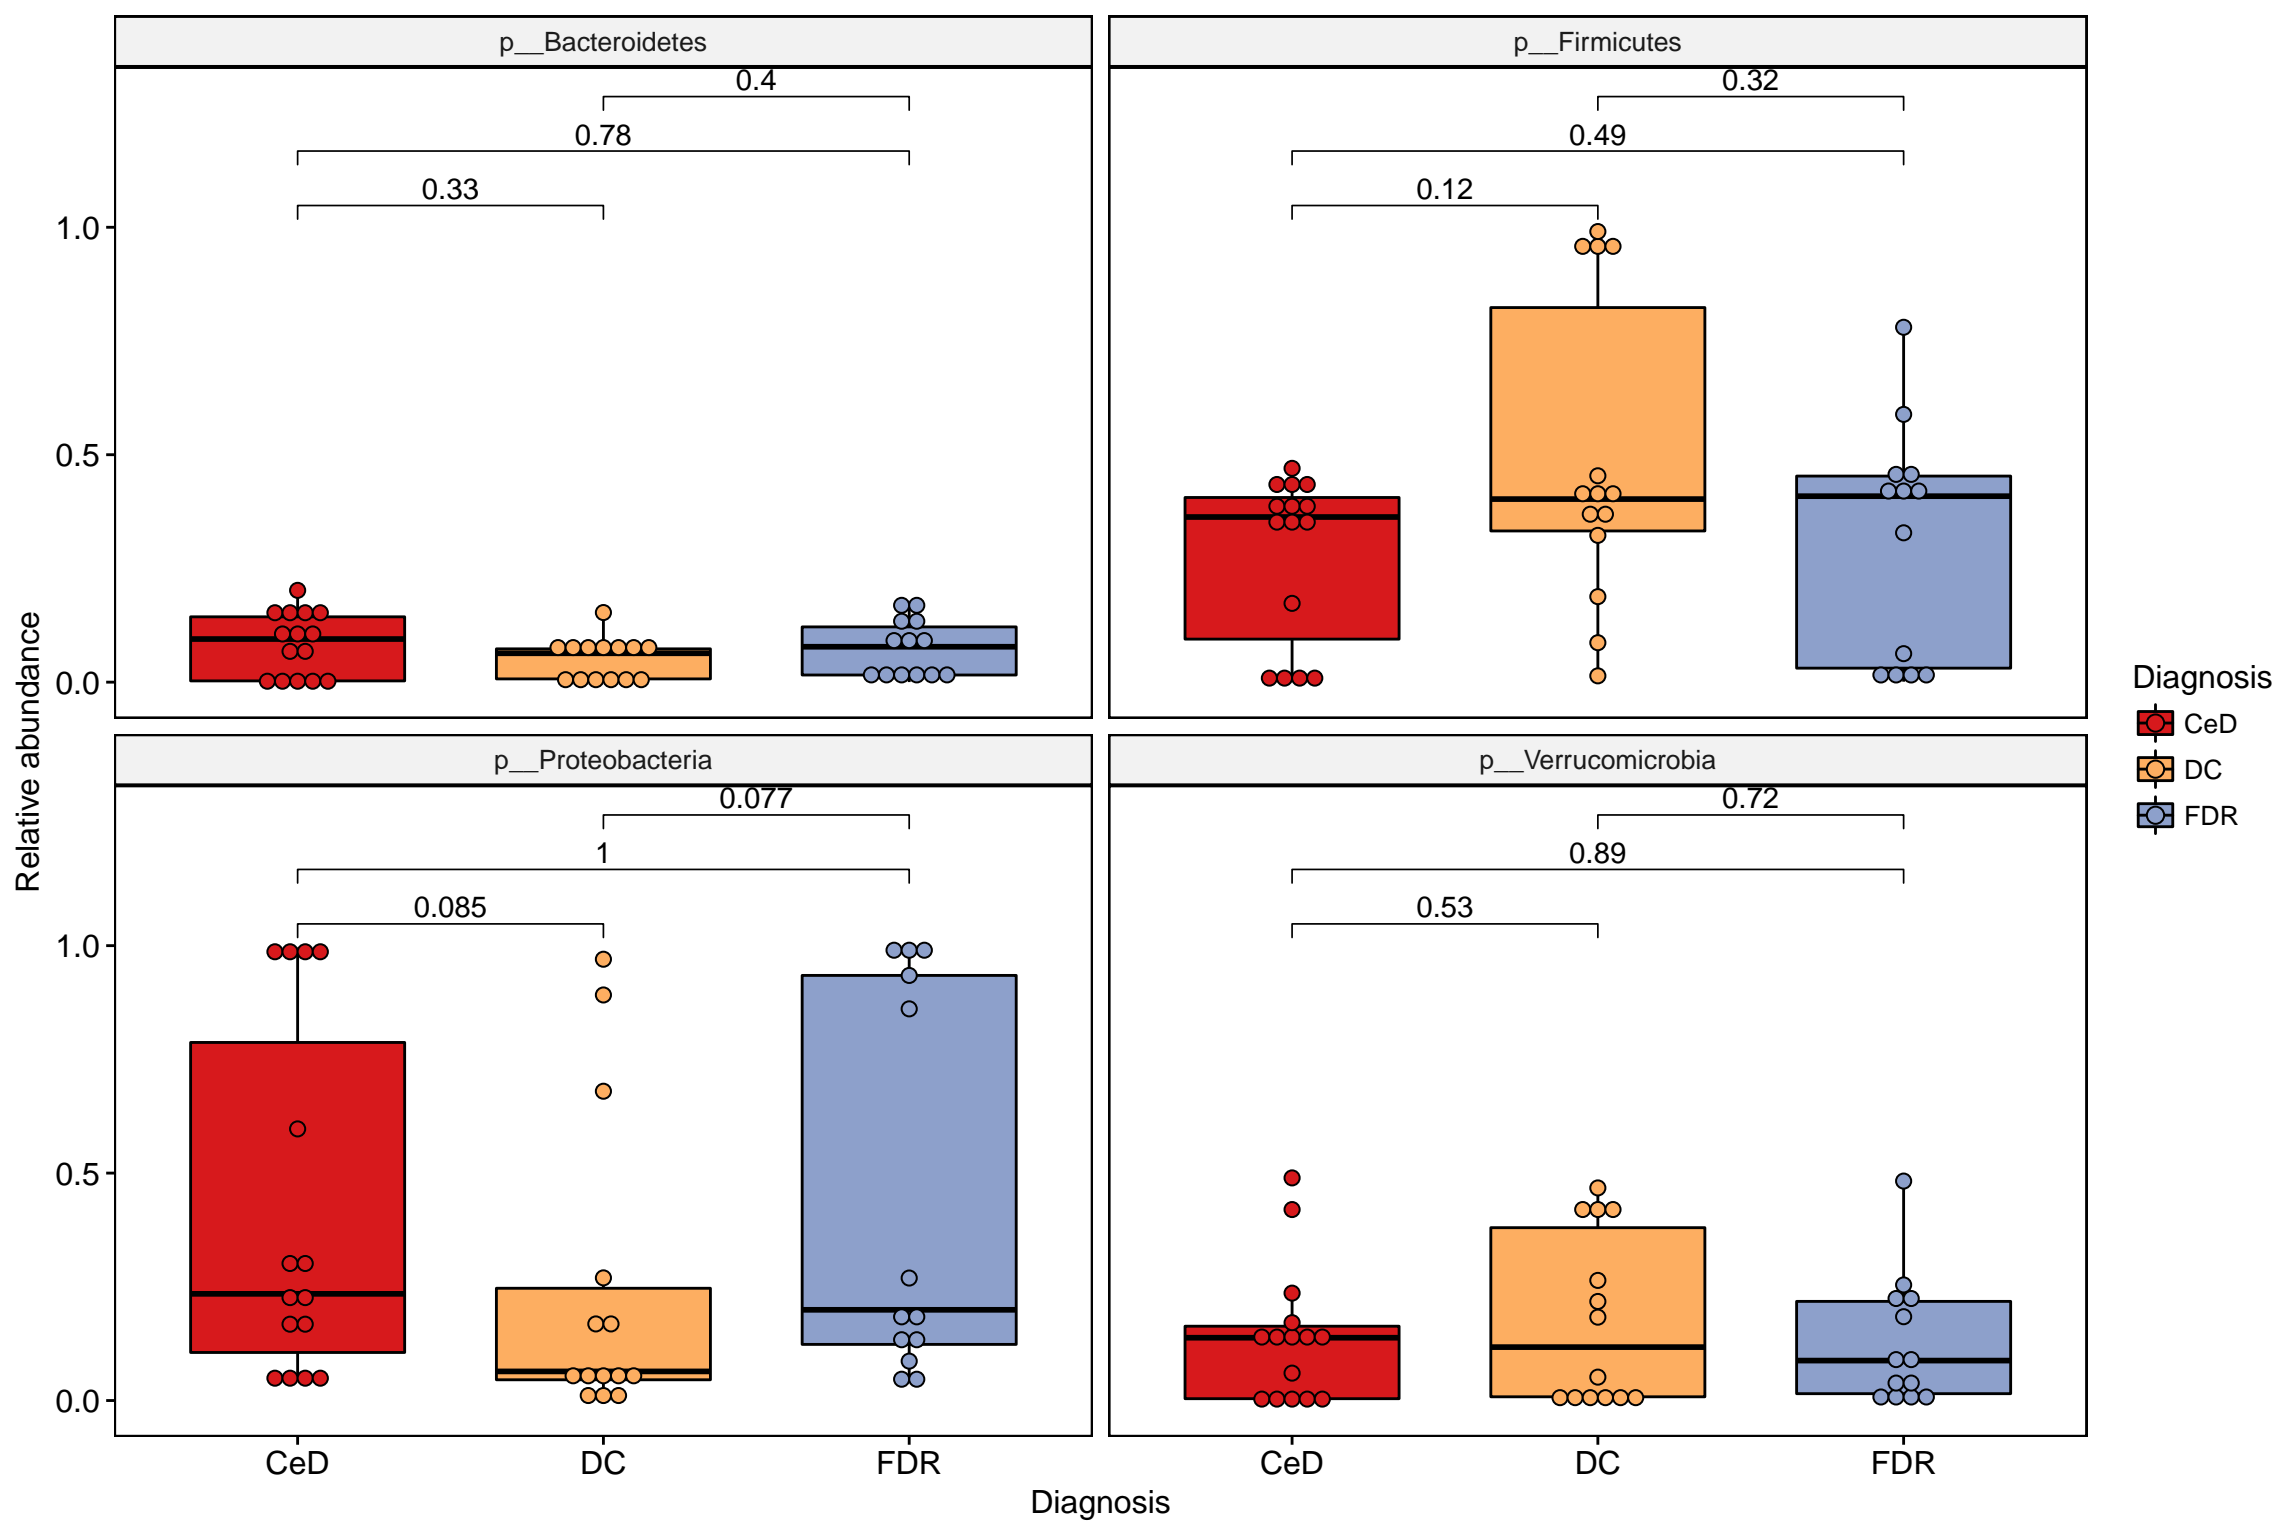

**CeD**

**FDR**

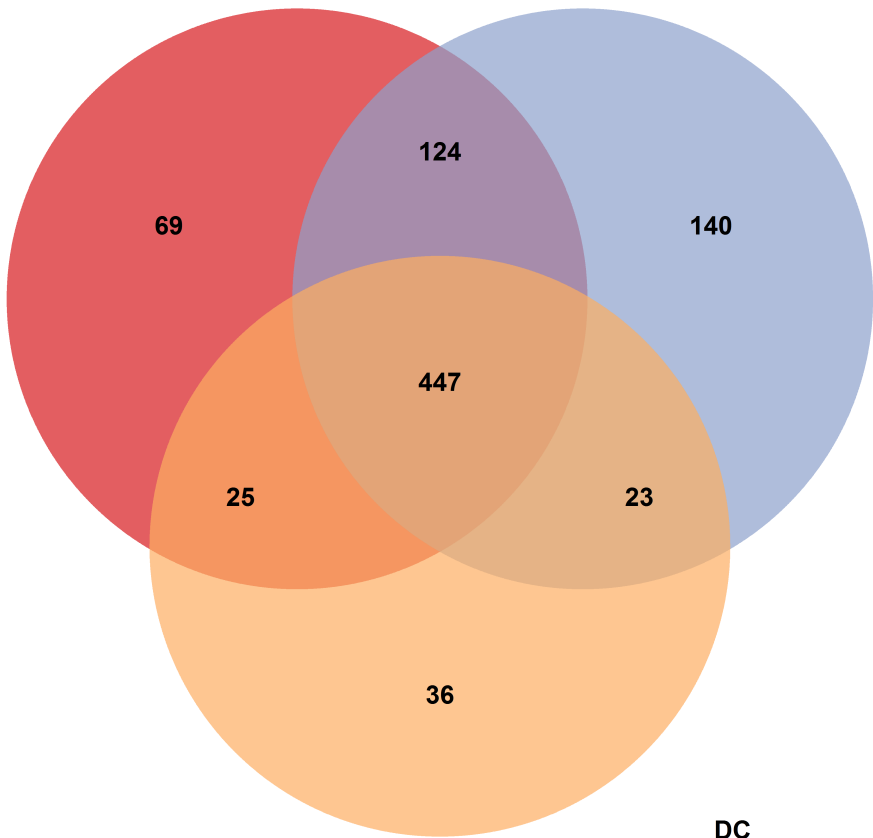

**DC**

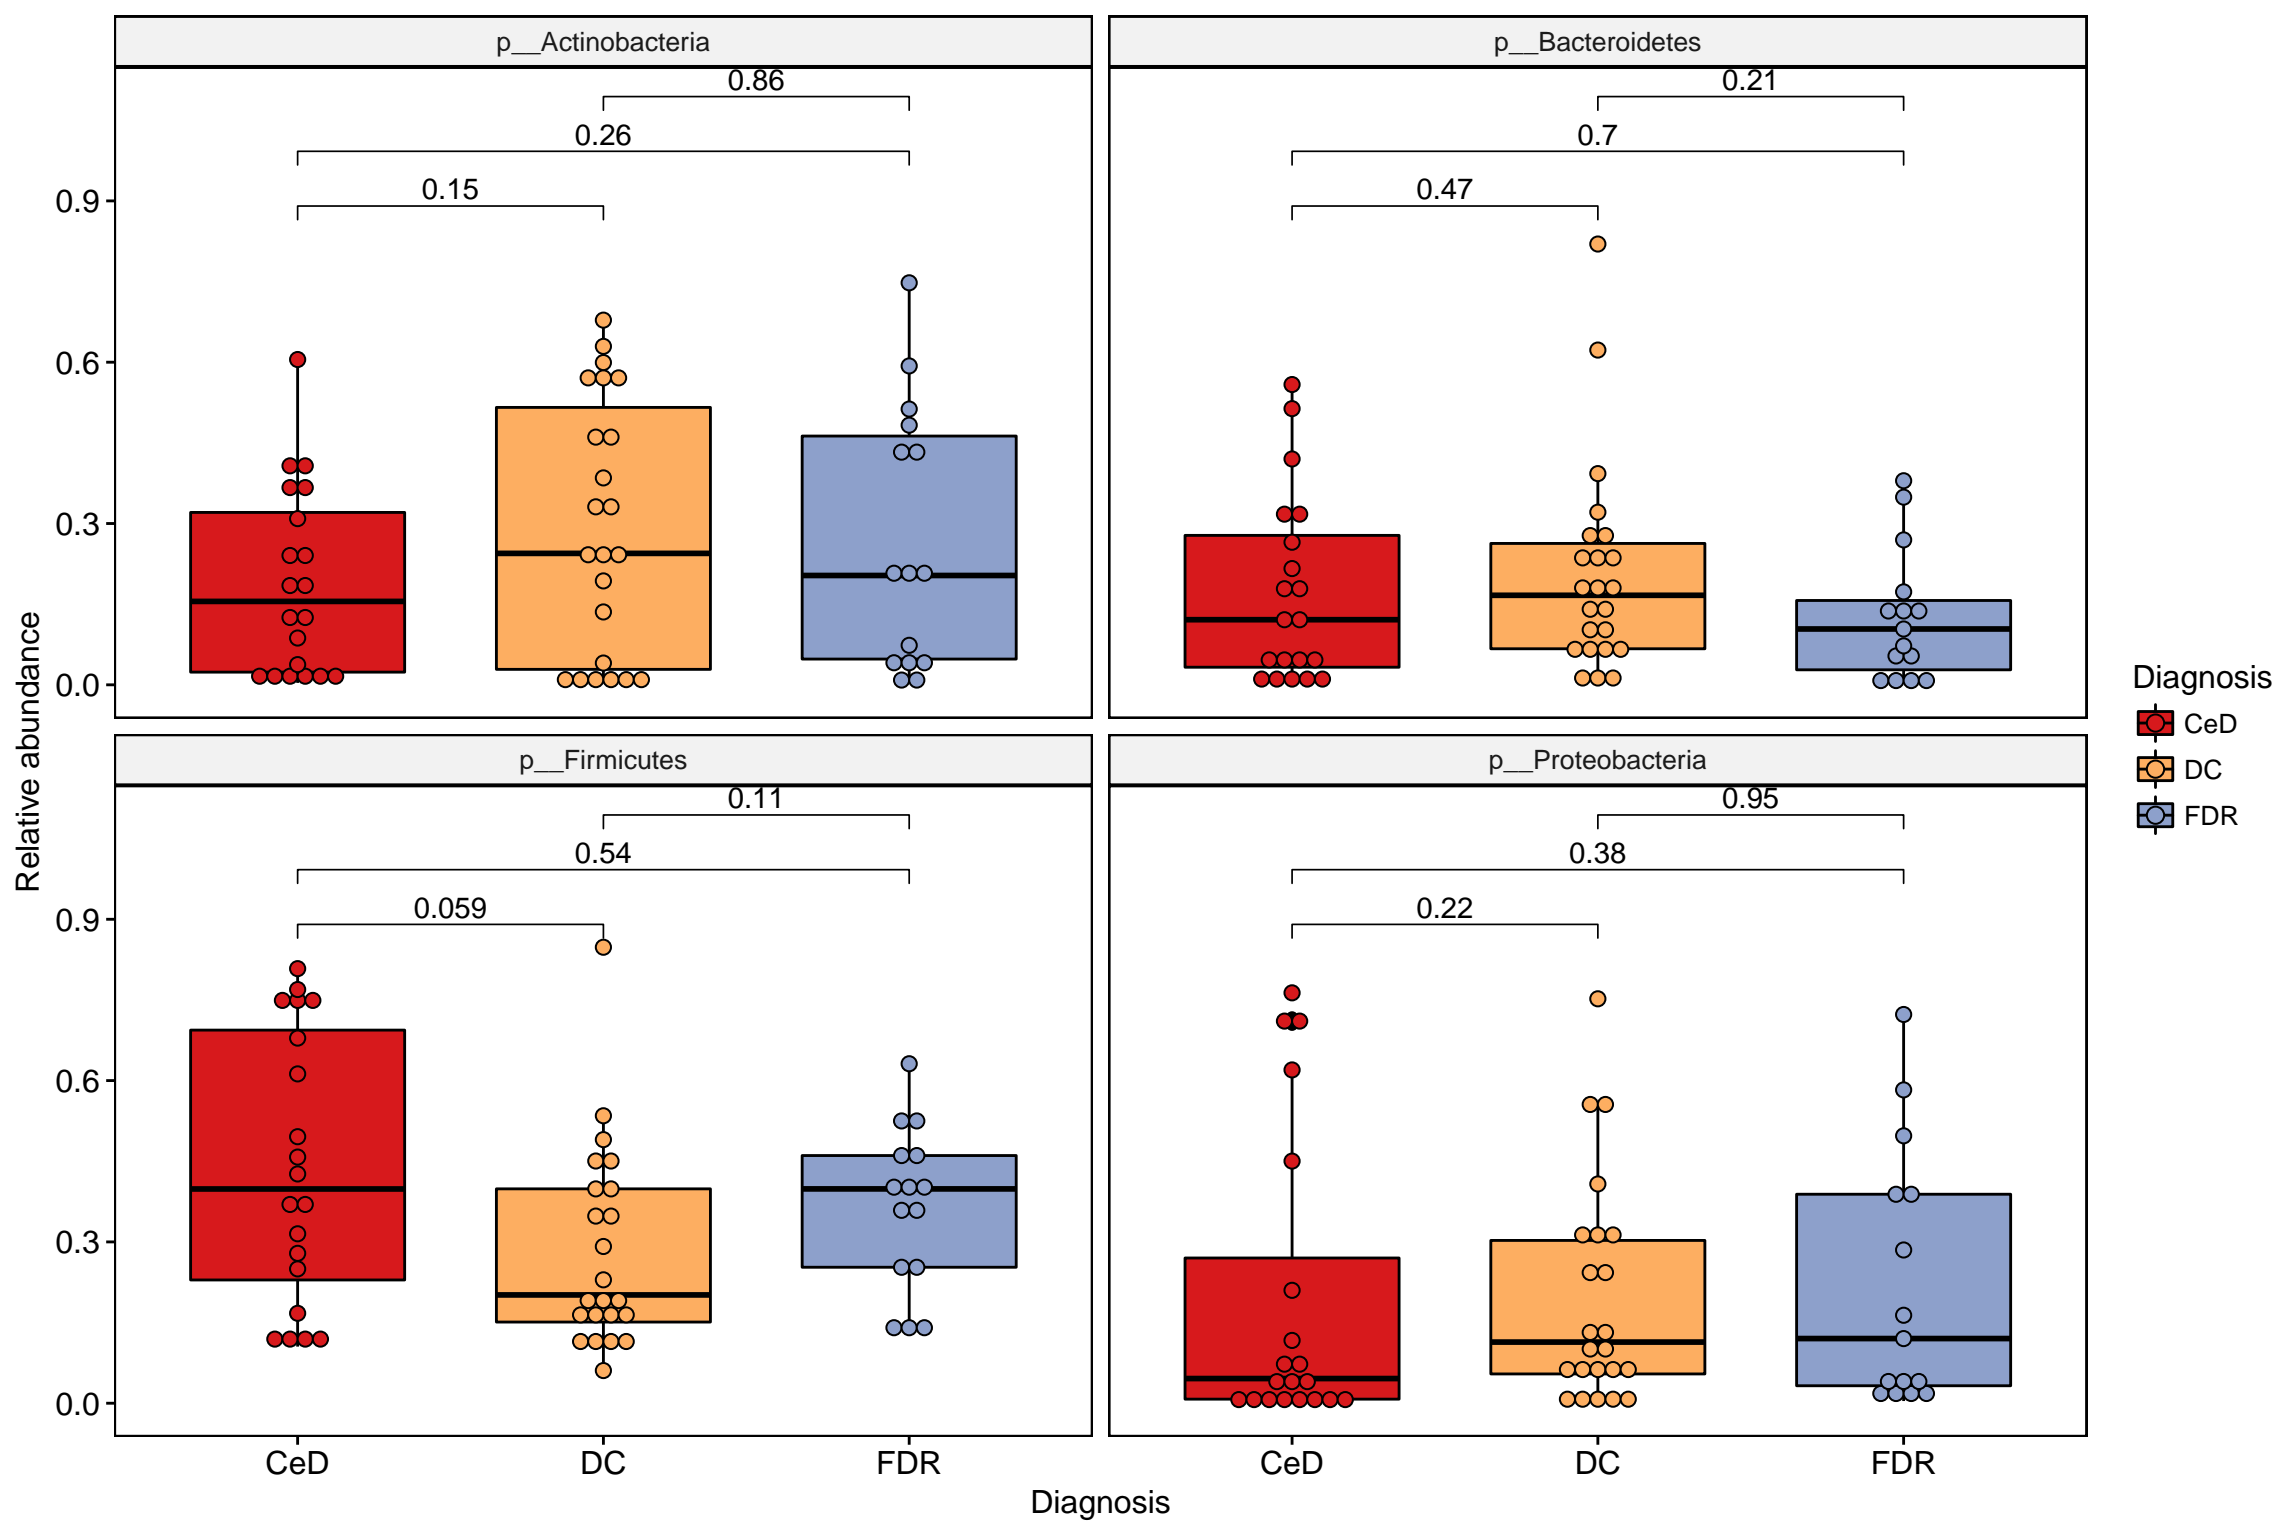

**CeD**

**FDR**

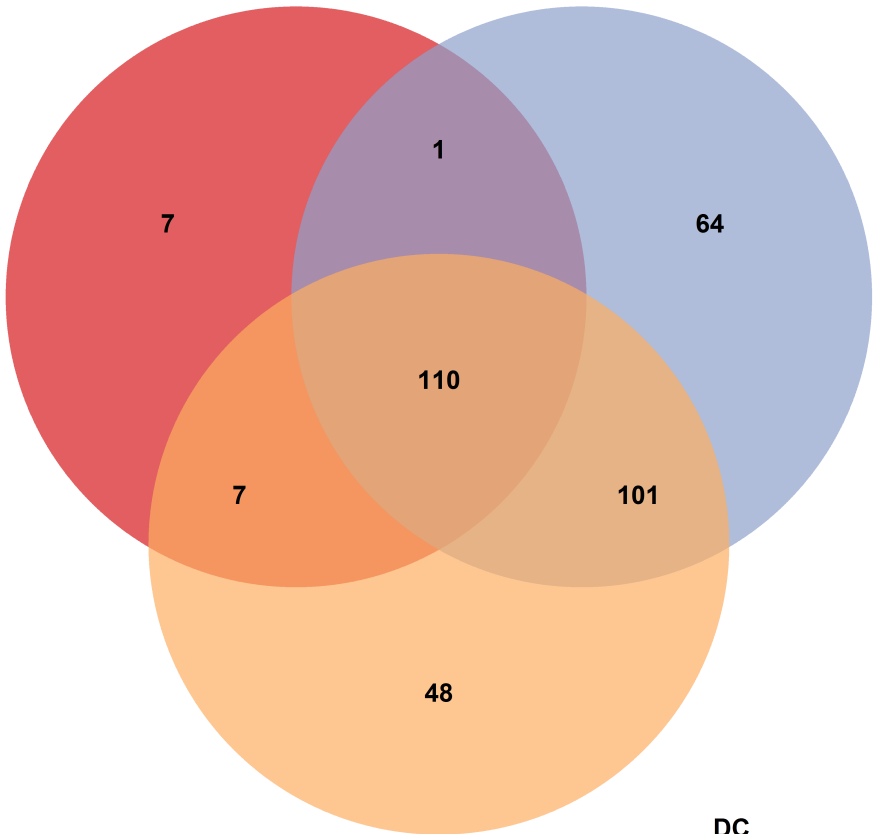

**DC**
